# Supplementary material
Source: PubMed Central journal article supplement (PMC2691688)

## Supplementary Information

### Disruption of an AP-2 $\alpha$ binding site in an *IRF6* enhancer is strongly

### associated with cleft lip

Fedik Rahimov<sup>1</sup>, Mary L. Marazita<sup>2</sup>, Axel Visel<sup>3</sup>, Margaret E. Cooper<sup>2</sup>, Michael J. Hitchler<sup>4</sup>, Michele Rubini<sup>5</sup>, Frederick E. Domann<sup>4</sup>, Manika Govil<sup>2</sup>, Kaare Christensen<sup>6</sup>, Camille Bille<sup>6</sup>, Mads Melbye<sup>7</sup>, Astanand Jugessur<sup>8</sup>, Rolv T. Lie<sup>8</sup>, Allen J. Wilcox<sup>9</sup>, David R. Fitzpatrick<sup>10</sup>, Eric D. Green<sup>11</sup>, NISC Comparative Sequencing Program<sup>11</sup>, Peter A. Mossey<sup>12</sup>, Julian Little<sup>13</sup>, Regine P. Steegers-Theunissen<sup>14</sup>, Len A. Pennacchio<sup>3</sup>, Brian C. Schutte<sup>1</sup> and Jeffrey C. Murray<sup>1</sup>

<sup>1</sup>Department of Pediatrics, University of Iowa, 2182 ML, S Grand Ave, Iowa City, IA 52242 <sup>2</sup>Center for Craniofacial and Dental Genetics, Department of Oral Biology, School of Dental Medicine, University of Pittsburgh, Suite 500, Bridgeside Point Building, Pittsburgh, PA 15219 <sup>3</sup>Genomics Division, Lawrence Berkeley National Laboratory, Berkeley, CA 94720 <sup>4</sup>Department of Radiation Oncology, University of Iowa, 4202 MERF, Iowa City, IA 52242 <sup>5</sup>Department of Experimental Diagnostic Medicine, Medical Genetics Unit, University of Ferrara, Ferrara, Italy <sup>6</sup>Center for the Prevention of Congenital Malformations, Institute of Public Health, University of Southern Denmark, J.B. Winsløvs Vej 9B, 5000 Odense C, Denmark <sup>7</sup>Department of Epidemiology Research, Danish Epidemiology Science Center, Statens Serum Institute, Copenhagen, Denmark <sup>8</sup>Section for Epidemiology and Medical Statistics, Department of Public Health and Primary Health Care, University of Bergen, Kalfarveien 31, N-5018, Bergen, Norway <sup>9</sup>Epidemiology Branch, National Institute of Environmental Health Sciences, National Institutes of Health, 111 T.W. Alexander Drive, Durham, NC 27709 <sup>10</sup>MRC Human Genetics Unit, Western General Hospital, Edinburgh EH4 2XU, UK <sup>11</sup>Genome Technology Branch and NIH Intramural Sequencing Center, National Human Genome Research Institute, National Institutes of Health, Bethesda, MD 20892 <sup>12</sup>Dental Hospital & School, University of Dundee, Dundee, Scotland, UK <sup>13</sup>Department of Epidemiology and Community Medicine, University of Ottawa, 451 Smyth Road, Room 3227, Ottawa, Ontario, Canada K1H 8M5 <sup>14</sup>University Medical Center, Dr. Molewaterplein 40, 3015 GD Rotterdam, The Netherlands

Corresponding author: Jeffrey C. Murray, M.D.

Address: University of Iowa, Department of Pediatrics, 2182 ML  
S Grand Ave, Iowa City, IA 52242, USA

Phone: (319) 335-6897

Fax: (319) 335-6970

E-mail: jeff-murray@uiowa.edu

## **Supplementary methods**

### **Comparative genomic sequence analysis**

MultiPipMaker, <http://pipmaker.bx.psu.edu/pipmaker>

WebMCS, <http://zoo.nhgri.nih.gov/mcs>

### **Sequencing**

Primer 3, <http://fokker.wi.mit.edu/primer3/input.htm>

### **Electrophoretic mobility shift assay (EMSA)**

Infrared dye (IRDye-700) end-labeled and unlabeled oligonucleotide probes were purchased from LI-COR Biosciences (Lincoln, NE) and IDT (Coralville, IA), respectively. We performed EMSAs by using the LI-COR EMSA Kit. Briefly, 6 $\mu$ g of human recombinant AP-2 $\alpha$  protein (Promega) was incubated with 2.5nM of labeled probe in 20 $\mu$ l binding reaction for 20 min at 4 $^{\circ}$ C. Each binding reaction contained 2 $\mu$ l of LI-COR 10X binding buffer, 2.5mM DTT, 2.5% Tween-20 and 1%NP-40. To prevent nonspecific binding, 1 $\mu$ g of poly(dI-dC) and 0.1 $\mu$ g of shared salmon sperm DNA were added to each reaction. The samples were then electrophoresed for 2.5 hours at 280V in 0.5XTBE buffer on an 8% polyacrylamide gel at 4 $^{\circ}$ C following pre-run of the gels for 1hr at 200V. The gel was then visualized by Odyssey<sup>®</sup> Infrared Imaging System (LI-COR). For competition experiments, a 50-, 100-, and 200-fold molar excess of unlabeled competitor oligonucleotide probe was incubated for 20min before addition of the labeled probe. For supershift assay, 3 $\mu$ l of anti-AP-2 $\alpha$  antibody (Upstate Biotechnology) was incubated for 20 min at 4 $^{\circ}$ C prior to the addition of the labeled probe.

## Chromatin immunoprecipitation (ChIP) assay

Protein cross-linked chromatin from  $\sim 2 \times 10^7$  Ad-AP-2 $\alpha$ -infected and uninfected HaCaT keratinocyte cells was isolated as detailed previously<sup>1</sup>. A small amount of the chromatin sample was removed as input control, while the remainder was split into two equal parts and immunoprecipitated with 10 $\mu$ g of anti-AP-2 $\alpha$  antibody or control mouse IgG overnight at 4°C with agitation.

Chromatin/antibody complexes were then collected using Protein G agarose followed by washing and elution according to the manufacturer's instructions.

DNA was then purified from input chromatin and immunoprecipitation elutions by reversing crosslinks using 200mM NaCl at 65°C for 4 hr followed by the Qiagen DNeasy Kit according to manufacturer's protocol. The amount of

immunoprecipitated target region was determined by SYBR Green (Applied Biosystems) quantitative real-time PCR with primers for the target sequence in MCS-9.7 and control region (**Supplementary Table 4**) at a final concentration of 100nM. Specific amplification of the target sequences were tested on agarose gel. Real-time PCR was carried out in triplicate on 5ng of DNA under the following conditions: 10 min denaturation at 95°C, followed by 40 cycles of 95°C for 10 sec and 60°C for 30 sec. Amplification of the target amplicon was monitored as a function of increased SYBR Green fluorescence. An analysis threshold was set and the cycle threshold ( $C_t$ ) computed for each sample. Fold enrichment of target sequence was calculated using the following formula (Fold enrichment =  $2^{(C_t \text{ AP-2}\alpha\text{-Ab IPed}) - (C_t \text{ IgG IPed})}$ ).

## Luciferase reporter assay

For luciferase reporter assay we generated reporter constructs by inserting 540bp genomic segment (chr1:208055787-208056326, UCSC hg18) containing the entire MCS-9.7Kb region upstream of firefly luciferase open reading frame (ORF) driven by the SV40 promoter. DNA samples from individuals homozygous for -14474A>G, -14523G>A, and rs642961 variants were PCR amplified and cloned into the pGL3-Basic and pGL3-Promoter vectors (Promega) in both orientations. HFK cells were seeded in 12-well plates at  $\sim 4 \times 10^7$  cells/well density in 1mL of K-SFM media supplemented with rEGF (0.16ng/mL) and BPE (25 $\mu$ g/mL) 24 hours prior to transfection. These cells were then cotransfected with 1 $\mu$ g of reporter construct and 20ng hRL-TK renilla luciferase plasmid using 2 $\mu$ g of Lipofectamine™ LTX reagent in 500 $\mu$ l of reduced-serum Opti-MEM® I media (Invitrogen). Dual Luciferase® Assay (Promega) was performed 24 hours after transfection according to manufacturer's protocol. The pGL3-Basic and pGL3-Promoter vectors were used as controls. Renilla luciferase was used as an internal control to normalize the firefly luciferase activity. Luciferase activity was measured with Wallac Victor<sup>2</sup> luminometer (PerkinElmer).

## References

1. Provenzano, M.J. *et al.* AP-2 participates in the transcriptional control of the amyloid precursor protein (APP) gene in oral squamous cell carcinoma. *Exp Mol Pathol* **83**, 277-282 (2007).

**Supplementary Table 1: Multispecies conserved sequences (MCSs)**

| <b>Chromosome</b> | <b>Start*</b> | <b>End*</b> | <b>Length (bp)</b> | <b>Gene</b> | <b>Location</b> | <b>Sequenced MCSs**</b> |
|-------------------|---------------|-------------|--------------------|-------------|-----------------|-------------------------|
| chr1              | 207788205     | 207788237   | 33                 |             | Intergenic      |                         |
| chr1              | 207788244     | 207788275   | 32                 |             | Intergenic      |                         |
| chr1              | 207789550     | 207789648   | 99                 |             | Intergenic      |                         |
| chr1              | 207796706     | 207796768   | 63                 |             | Intergenic      |                         |
| chr1              | 207796846     | 207796878   | 33                 |             | Intergenic      |                         |
| chr1              | 207796931     | 207796984   | 54                 |             | Intergenic      |                         |
| chr1              | 207797241     | 207797265   | 25                 |             | Intergenic      |                         |
| chr1              | 207797307     | 207797344   | 38                 |             | Intergenic      |                         |
| chr1              | 207797431     | 207797455   | 25                 |             | Intergenic      |                         |
| chr1              | 207797537     | 207797562   | 26                 |             | Intergenic      |                         |
| chr1              | 207801420     | 207801522   | 103                |             | Intergenic      |                         |
| chr1              | 207801526     | 207801551   | 26                 |             | Intergenic      |                         |
| chr1              | 207801554     | 207801598   | 45                 |             | Intergenic      |                         |
| chr1              | 207801625     | 207801669   | 45                 |             | Intergenic      |                         |
| chr1              | 207801704     | 207801756   | 53                 |             | Intergenic      |                         |
| chr1              | 207802642     | 207802673   | 32                 |             | Intergenic      |                         |
| chr1              | 207804077     | 207804109   | 33                 |             | Intergenic      |                         |
| chr1              | 207804937     | 207805044   | 108                |             | Intergenic      |                         |
| chr1              | 207809952     | 207809985   | 34                 |             | Intergenic      |                         |
| chr1              | 207815270     | 207815294   | 25                 |             | Intergenic      |                         |
| chr1              | 207816864     | 207816889   | 26                 |             | Intergenic      |                         |
| chr1              | 207818596     | 207818624   | 29                 |             | Intergenic      |                         |
| chr1              | 207823399     | 207823430   | 32                 |             | Intergenic      |                         |
| chr1              | 207823554     | 207823714   | 161                | CAMK1G      | <b>5' UTR</b>   |                         |
| chr1              | 207824257     | 207824283   | 27                 | CAMK1G      | Intron 1        |                         |
| chr1              | 207824412     | 207824438   | 27                 | CAMK1G      | Intron 1        |                         |
| chr1              | 207824532     | 207824589   | 58                 | CAMK1G      | Intron 1        |                         |
| chr1              | 207824685     | 207824711   | 27                 | CAMK1G      | Intron 1        |                         |
| chr1              | 207824841     | 207824874   | 34                 | CAMK1G      | Intron 1        |                         |
| chr1              | 207825701     | 207825729   | 29                 | CAMK1G      | Intron 1        |                         |
| chr1              | 207825732     | 207825757   | 26                 | CAMK1G      | Intron 1        |                         |
| chr1              | 207825769     | 207825835   | 67                 | CAMK1G      | Intron 1        |                         |
| chr1              | 207825862     | 207825889   | 28                 | CAMK1G      | Intron 1        |                         |
| chr1              | 207827641     | 207827665   | 25                 | CAMK1G      | Intron 1        |                         |
| chr1              | 207827849     | 207827886   | 38                 | CAMK1G      | Intron 1        |                         |
| chr1              | 207827888     | 207827916   | 29                 | CAMK1G      | Intron 1        |                         |
| chr1              | 207828777     | 207828805   | 29                 | CAMK1G      | Intron 1        |                         |
| chr1              | 207830410     | 207830556   | 147                | CAMK1G      | Intron 1        |                         |
| chr1              | 207834792     | 207834817   | 26                 | CAMK1G      | Intron 1        |                         |
| chr1              | 207834926     | 207835061   | 136                | CAMK1G      | <b>Exon 2</b>   |                         |
| chr1              | 207835888     | 207835913   | 26                 | CAMK1G      | Intron 2        |                         |
| chr1              | 207835939     | 207835966   | 28                 | CAMK1G      | Intron 2        |                         |
| chr1              | 207836637     | 207836663   | 27                 | CAMK1G      | Intron 2        |                         |
| chr1              | 207839947     | 207840095   | 149                | CAMK1G      | <b>Exon 3</b>   |                         |
| chr1              | 207840330     | 207840365   | 36                 | CAMK1G      | Intron 3        |                         |
| chr1              | 207843172     | 207843273   | 102                | CAMK1G      | <b>Exon 4</b>   |                         |
| chr1              | 207845494     | 207845653   | 160                | CAMK1G      | <b>Exon 5</b>   |                         |
| chr1              | 207846278     | 207846423   | 146                | CAMK1G      | <b>Exon 6</b>   |                         |
| chr1              | 207847819     | 207847915   | 97                 | CAMK1G      | <b>Exon 7</b>   |                         |
| chr1              | 207848968     | 207849072   | 105                | CAMK1G      | <b>Exon 8</b>   |                         |
| chr1              | 207849174     | 207849209   | 36                 | CAMK1G      | Intron 8        |                         |

|      |           |           |     |        |                |
|------|-----------|-----------|-----|--------|----------------|
| chr1 | 207849687 | 207849792 | 106 | CAMK1G | Intron 8       |
| chr1 | 207849810 | 207849892 | 83  | CAMK1G | <b>Exon 9</b>  |
| chr1 | 207851428 | 207851533 | 106 | CAMK1G | <b>Exon 10</b> |
| chr1 | 207851746 | 207851858 | 113 | CAMK1G | <b>Exon 11</b> |
| chr1 | 207851884 | 207851923 | 40  | CAMK1G | <b>Exon 11</b> |
| chr1 | 207851998 | 207852072 | 75  | CAMK1G | <b>Exon 11</b> |
| chr1 | 207852079 | 207852121 | 43  | CAMK1G | <b>Exon 11</b> |
| chr1 | 207852124 | 207852196 | 73  | CAMK1G | <b>Exon 11</b> |
| chr1 | 207852752 | 207852777 | 26  | CAMK1G | <b>Exon 12</b> |
| chr1 | 207852794 | 207852851 | 58  | CAMK1G | <b>Exon 12</b> |
| chr1 | 207853856 | 207853928 | 73  | CAMK1G | <b>3'UTR</b>   |
| chr1 | 207854856 | 207854892 | 37  | LAMB3  | <b>3'UTR</b>   |
| chr1 | 207855236 | 207855326 | 91  | LAMB3  | <b>Exon 22</b> |
| chr1 | 207855352 | 207855396 | 45  | LAMB3  | <b>Exon 22</b> |
| chr1 | 207856431 | 207856497 | 67  | LAMB3  | <b>Exon 21</b> |
| chr1 | 207856535 | 207856602 | 68  | LAMB3  | <b>Exon 21</b> |
| chr1 | 207857541 | 207857570 | 30  | LAMB3  | <b>Exon 20</b> |
| chr1 | 207857869 | 207857953 | 85  | LAMB3  | <b>Exon 19</b> |
| chr1 | 207857958 | 207857983 | 26  | LAMB3  | <b>Exon 19</b> |
| chr1 | 207858419 | 207858443 | 25  | LAMB3  | <b>Exon 18</b> |
| chr1 | 207858454 | 207858545 | 92  | LAMB3  | <b>Exon 18</b> |
| chr1 | 207858547 | 207858638 | 92  | LAMB3  | <b>Exon 18</b> |
| chr1 | 207858872 | 207858896 | 25  | LAMB3  | Intron 17      |
| chr1 | 207858922 | 207858960 | 39  | LAMB3  | Intron 17      |
| chr1 | 207859016 | 207859043 | 28  | LAMB3  | Intron 17      |
| chr1 | 207861480 | 207861507 | 28  | LAMB3  | Intron 17      |
| chr1 | 207861566 | 207861592 | 27  | LAMB3  | Intron 17      |
| chr1 | 207861599 | 207861627 | 29  | LAMB3  | Intron 17      |
| chr1 | 207862500 | 207862541 | 42  | LAMB3  | <b>Exon 17</b> |
| chr1 | 207862543 | 207862607 | 65  | LAMB3  | <b>Exon 17</b> |
| chr1 | 207862943 | 207863017 | 75  | LAMB3  | <b>Exon 16</b> |
| chr1 | 207863058 | 207863083 | 26  | LAMB3  | <b>Exon 16</b> |
| chr1 | 207863224 | 207863250 | 27  | LAMB3  | Intron 15      |
| chr1 | 207863467 | 207863503 | 37  | LAMB3  | <b>Exon 15</b> |
| chr1 | 207863575 | 207863612 | 38  | LAMB3  | <b>Exon 15</b> |
| chr1 | 207863627 | 207863654 | 28  | LAMB3  | <b>Exon 15</b> |
| chr1 | 207863675 | 207863701 | 27  | LAMB3  | <b>Exon 15</b> |
| chr1 | 207863803 | 207863860 | 58  | LAMB3  | <b>Exon 14</b> |
| chr1 | 207863879 | 207863907 | 29  | LAMB3  | <b>Exon 14</b> |
| chr1 | 207865140 | 207865167 | 28  | LAMB3  | Intron 13      |
| chr1 | 207865273 | 207865313 | 41  | LAMB3  | Intron 13      |
| chr1 | 207865636 | 207865664 | 29  | LAMB3  | <b>Exon 13</b> |
| chr1 | 207865825 | 207865954 | 130 | LAMB3  | <b>Exon 13</b> |
| chr1 | 207865971 | 207866003 | 33  | LAMB3  | <b>Exon 13</b> |
| chr1 | 207866834 | 207866902 | 69  | LAMB3  | <b>Exon 12</b> |
| chr1 | 207866905 | 207866954 | 50  | LAMB3  | <b>Exon 12</b> |
| chr1 | 207867347 | 207867396 | 50  | LAMB3  | <b>Exon 11</b> |
| chr1 | 207867401 | 207867518 | 118 | LAMB3  | <b>Exon 11</b> |
| chr1 | 207867526 | 207867554 | 29  | LAMB3  | <b>Exon 11</b> |
| chr1 | 207867790 | 207867819 | 30  | LAMB3  | Intron 10      |
| chr1 | 207867991 | 207868170 | 180 | LAMB3  | <b>Exon 10</b> |
| chr1 | 207869506 | 207869533 | 28  | LAMB3  | Intron 8       |
| chr1 | 207869698 | 207869726 | 29  | LAMB3  | <b>Exon 9</b>  |
| chr1 | 207869732 | 207869901 | 170 | LAMB3  | <b>Exon 9</b>  |

|      |           |           |     |       |               |
|------|-----------|-----------|-----|-------|---------------|
| chr1 | 207870581 | 207870606 | 26  | LAMB3 | <b>Exon 8</b> |
| chr1 | 207870610 | 207870711 | 102 | LAMB3 | <b>Exon 8</b> |
| chr1 | 207871136 | 207871173 | 38  | LAMB3 | Intron 7      |
| chr1 | 207871175 | 207871206 | 32  | LAMB3 | Intron 7      |
| chr1 | 207872604 | 207872749 | 146 | LAMB3 | <b>Exon 7</b> |
| chr1 | 207873029 | 207873072 | 44  | LAMB3 | <b>Exon 6</b> |
| chr1 | 207873077 | 207873106 | 30  | LAMB3 | <b>Exon 6</b> |
| chr1 | 207874441 | 207874488 | 48  | LAMB3 | <b>Exon 5</b> |
| chr1 | 207874515 | 207874598 | 84  | LAMB3 | <b>Exon 5</b> |
| chr1 | 207877073 | 207877101 | 29  | LAMB3 | Intron 4      |
| chr1 | 207877107 | 207877136 | 30  | LAMB3 | Intron 4      |
| chr1 | 207877287 | 207877314 | 28  | LAMB3 | Intron 4      |
| chr1 | 207877605 | 207877641 | 37  | LAMB3 | Intron 4      |
| chr1 | 207877897 | 207877969 | 73  | LAMB3 | <b>Exon 4</b> |
| chr1 | 207878496 | 207878539 | 44  | LAMB3 | <b>Exon 3</b> |
| chr1 | 207878541 | 207878633 | 93  | LAMB3 | <b>Exon 3</b> |
| chr1 | 207881708 | 207881756 | 49  | LAMB3 | Intron 2      |
| chr1 | 207881781 | 207881823 | 43  | LAMB3 | Intron 2      |
| chr1 | 207881868 | 207881927 | 60  | LAMB3 | Intron 2      |
| chr1 | 207883043 | 207883076 | 34  | LAMB3 | Intron 2      |
| chr1 | 207883312 | 207883336 | 25  | LAMB3 | Intron 2      |
| chr1 | 207883382 | 207883443 | 62  | LAMB3 | Intron 2      |
| chr1 | 207883470 | 207883504 | 35  | LAMB3 | Intron 2      |
| chr1 | 207885060 | 207885091 | 32  | LAMB3 | Intron 2      |
| chr1 | 207885778 | 207885802 | 25  | LAMB3 | Intron 2      |
| chr1 | 207885957 | 207886049 | 93  | LAMB3 | Intron 2      |
| chr1 | 207888446 | 207888499 | 54  | LAMB3 | Intron 2      |
| chr1 | 207888559 | 207888593 | 35  | LAMB3 | Intron 2      |
| chr1 | 207888959 | 207888983 | 25  | LAMB3 | Intron 2      |
| chr1 | 207889925 | 207890068 | 144 | LAMB3 | <b>Exon 2</b> |
| chr1 | 207892416 | 207892535 | 120 | LAMB3 | <b>5'UTR</b>  |
| chr1 | 207892538 | 207892562 | 25  |       | Intergenic    |
| chr1 | 207892880 | 207892907 | 28  |       | Intergenic    |
| chr1 | 207893095 | 207893121 | 27  |       | Intergenic    |
| chr1 | 207893167 | 207893216 | 50  |       | Intergenic    |
| chr1 | 207894019 | 207894055 | 37  |       | Intergenic    |
| chr1 | 207894069 | 207894093 | 25  |       | Intergenic    |
| chr1 | 207895926 | 207895955 | 30  |       | Intergenic    |
| chr1 | 207902976 | 207903001 | 26  |       | Intergenic    |
| chr1 | 207909098 | 207909128 | 31  |       | Intergenic    |
| chr1 | 207913313 | 207913348 | 36  |       | Intergenic    |
| chr1 | 207913388 | 207913412 | 25  |       | Intergenic    |
| chr1 | 207913607 | 207913642 | 36  |       | Intergenic    |
| chr1 | 207913674 | 207913698 | 25  |       | Intergenic    |
| chr1 | 207914025 | 207914085 | 61  |       | Intergenic    |
| chr1 | 207914678 | 207914712 | 35  |       | Intergenic    |
| chr1 | 207915652 | 207915708 | 57  | G0S2  | <b>Exon 2</b> |
| chr1 | 207915714 | 207915817 | 104 | G0S2  | <b>Exon 2</b> |
| chr1 | 207915931 | 207915966 | 36  | G0S2  | <b>Exon 2</b> |
| chr1 | 207916172 | 207916206 | 35  | G0S2  | <b>3'UTR</b>  |
| chr1 | 207916278 | 207916302 | 25  | G0S2  | <b>3'UTR</b>  |
| chr1 | 207916313 | 207916345 | 33  | G0S2  | <b>3'UTR</b>  |
| chr1 | 207923818 | 207923843 | 26  |       | Intergenic    |
| chr1 | 207924718 | 207924743 | 26  |       | Intergenic    |

|      |           |           |     |          |               |
|------|-----------|-----------|-----|----------|---------------|
| chr1 | 207925789 | 207925848 | 60  |          | Intergenic    |
| chr1 | 207925992 | 207926182 | 191 | HSD11B1  | <b>5' UTR</b> |
| chr1 | 207926395 | 207926421 | 27  | HSD11B1  | Intron 1      |
| chr1 | 207926515 | 207926574 | 60  | HSD11B1  | Intron 1      |
| chr1 | 207927152 | 207927190 | 39  | HSD11B1  | Intron 1      |
| chr1 | 207927313 | 207927367 | 55  | HSD11B1  | Intron 1      |
| chr1 | 207927440 | 207927464 | 25  | HSD11B1  | Intron 1      |
| chr1 | 207927490 | 207927517 | 28  | HSD11B1  | Intron 1      |
| chr1 | 207927732 | 207927758 | 27  | HSD11B1  | Intron 1      |
| chr1 | 207927809 | 207927833 | 25  | HSD11B1  | Intron 1      |
| chr1 | 207933050 | 207933086 | 37  | HSD11B1  | Intron 1      |
| chr1 | 207933442 | 207933466 | 25  | HSD11B1  | Intron 1      |
| chr1 | 207938125 | 207938187 | 63  | HSD11B1  | Intron 1      |
| chr1 | 207943482 | 207943507 | 26  | HSD11B1  | Intron 1      |
| chr1 | 207943514 | 207943585 | 72  | HSD11B1  | Intron 1      |
| chr1 | 207944194 | 207944223 | 30  | HSD11B1  | Intron 1      |
| chr1 | 207944233 | 207944264 | 32  | HSD11B1  | Intron 1      |
| chr1 | 207944271 | 207944319 | 49  | HSD11B1  | Intron 1      |
| chr1 | 207944369 | 207944421 | 53  | HSD11B1  | Intron 1      |
| chr1 | 207944445 | 207944469 | 25  | HSD11B1  | Intron 1      |
| chr1 | 207944597 | 207944886 | 290 | HSD11B1  | Intron 1      |
| chr1 | 207944911 | 207944948 | 38  | HSD11B1  | <b>Exon 2</b> |
| chr1 | 207944952 | 207944982 | 31  | HSD11B1  | <b>Exon 2</b> |
| chr1 | 207944984 | 207945008 | 25  | HSD11B1  | <b>Exon 2</b> |
| chr1 | 207945771 | 207945892 | 122 | HSD11B1  | <b>Exon 3</b> |
| chr1 | 207946675 | 207946798 | 124 | HSD11B1  | <b>Exon 4</b> |
| chr1 | 207946898 | 207946951 | 54  | HSD11B1  | <b>Exon 5</b> |
| chr1 | 207946986 | 207947089 | 104 | HSD11B1  | <b>Exon 5</b> |
| chr1 | 207948394 | 207948472 | 79  | HSD11B1  | Intron 5      |
| chr1 | 207948515 | 207948578 | 64  | HSD11B1  | Intron 5      |
| chr1 | 207963094 | 207963119 | 26  | HSD11B1  | Intron 5      |
| chr1 | 207969333 | 207969362 | 30  | HSD11B1  | Intron 5      |
| chr1 | 207972418 | 207972488 | 71  | HSD11B1  | <b>Exon 6</b> |
| chr1 | 207972498 | 207972562 | 65  | HSD11B1  | <b>Exon 6</b> |
| chr1 | 207974271 | 207974301 | 31  | HSD11B1  | <b>Exon 7</b> |
| chr1 | 207974311 | 207974389 | 79  | HSD11B1  | <b>Exon 7</b> |
| chr1 | 207974419 | 207974443 | 25  | HSD11B1  | <b>Exon 7</b> |
| chr1 | 207974781 | 207974838 | 58  | HSD11B1  | <b>3' UTR</b> |
| chr1 | 207987979 | 207988013 | 35  |          | Intergenic    |
| chr1 | 207995964 | 207996020 | 57  |          | Intergenic    |
| chr1 | 207996028 | 207996063 | 36  | TRAF3IP3 | <b>5' UTR</b> |
| chr1 | 207996065 | 207996120 | 56  | TRAF3IP3 | <b>5' UTR</b> |
| chr1 | 207996199 | 207996245 | 47  | TRAF3IP3 | <b>5' UTR</b> |
| chr1 | 207996275 | 207996305 | 31  | TRAF3IP3 | <b>5' UTR</b> |
| chr1 | 207997859 | 207997883 | 25  | TRAF3IP3 | Intron 1      |
| chr1 | 207998521 | 207998553 | 33  | TRAF3IP3 | Intron 1      |
| chr1 | 207999880 | 208000159 | 280 | TRAF3IP3 | <b>Exon 3</b> |
| chr1 | 208000165 | 208000192 | 28  | TRAF3IP3 | <b>Exon 3</b> |
| chr1 | 208000194 | 208000235 | 42  | TRAF3IP3 | <b>Exon 3</b> |
| chr1 | 208001204 | 208001241 | 38  | TRAF3IP3 | Intron 3      |
| chr1 | 208001252 | 208001280 | 29  | TRAF3IP3 | Intron 3      |
| chr1 | 208002601 | 208002645 | 45  | TRAF3IP3 | <b>Exon 4</b> |
| chr1 | 208002763 | 208002858 | 96  | TRAF3IP3 | <b>Exon 5</b> |
| chr1 | 208003022 | 208003071 | 50  | TRAF3IP3 | <b>Exon 6</b> |



|      |           |           |     |          |                |                  |
|------|-----------|-----------|-----|----------|----------------|------------------|
| chr1 | 208003311 | 208003374 | 64  | TRAF3IP3 | <b>Exon 7</b>  |                  |
| chr1 | 208003453 | 208003572 | 120 | TRAF3IP3 | <b>Exon 8</b>  |                  |
| chr1 | 208006254 | 208006296 | 43  | TRAF3IP3 | Intron 8       |                  |
| chr1 | 208008512 | 208008652 | 141 | TRAF3IP3 | Intron 8       |                  |
| chr1 | 208008818 | 208008843 | 26  | TRAF3IP3 | Intron 8       |                  |
| chr1 | 208008901 | 208008934 | 34  | TRAF3IP3 | Intron 8       |                  |
| chr1 | 208009376 | 208009413 | 38  | TRAF3IP3 | Intron 8       |                  |
| chr1 | 208009423 | 208009622 | 200 | TRAF3IP3 | Intron 8       |                  |
| chr1 | 208012884 | 208013006 | 123 | TRAF3IP3 | <b>Exon 9</b>  |                  |
| chr1 | 208013991 | 208014030 | 40  | TRAF3IP3 | Intron 9       |                  |
| chr1 | 208015277 | 208015468 | 192 | TRAF3IP3 | <b>Exon 10</b> |                  |
| chr1 | 208015551 | 208015729 | 179 | TRAF3IP3 | <b>Exon 11</b> |                  |
| chr1 | 208017307 | 208017472 | 166 | TRAF3IP3 | <b>Exon 12</b> |                  |
| chr1 | 208017755 | 208017794 | 40  | TRAF3IP3 | Intron 12      | <b>MCS+28.3</b>  |
| chr1 | 208017915 | 208017943 | 29  | TRAF3IP3 | Intron 12      | <b>MCS+28.3</b>  |
| chr1 | 208018058 | 208018177 | 120 | TRAF3IP3 | <b>Exon 13</b> |                  |
| chr1 | 208019202 | 208019227 | 26  | TRAF3IP3 | Intron 13      |                  |
| chr1 | 208019237 | 208019384 | 148 | TRAF3IP3 | <b>Exon 14</b> |                  |
| chr1 | 208019395 | 208019424 | 30  | TRAF3IP3 | <b>Exon 14</b> |                  |
| chr1 | 208019535 | 208019565 | 31  | TRAF3IP3 | <b>Exon 14</b> |                  |
| chr1 | 208019580 | 208019652 | 73  | TRAF3IP3 | <b>Exon 14</b> |                  |
| chr1 | 208019654 | 208019678 | 25  | TRAF3IP3 | Intron 14      |                  |
| chr1 | 208020412 | 208020466 | 55  | TRAF3IP3 | <b>Exon 15</b> |                  |
| chr1 | 208020472 | 208020594 | 123 | TRAF3IP3 | <b>Exon 15</b> |                  |
| chr1 | 208020808 | 208020833 | 26  | TRAF3IP3 | Intron 15      |                  |
| chr1 | 208021304 | 208021416 | 113 | TRAF3IP3 | <b>Exon 16</b> |                  |
| chr1 | 208021420 | 208021444 | 25  | TRAF3IP3 | <b>Exon 16</b> |                  |
| chr1 | 208022022 | 208022110 | 89  | TRAF3IP3 | <b>Exon 17</b> |                  |
| chr1 | 208022787 | 208022906 | 120 | C1orf74  | <b>Exon 2</b>  |                  |
| chr1 | 208022908 | 208022958 | 51  | C1orf74  | <b>Exon 2</b>  |                  |
| chr1 | 208022973 | 208023127 | 155 | C1orf74  | <b>Exon 2</b>  |                  |
| chr1 | 208023155 | 208023238 | 84  | C1orf74  | <b>Exon 2</b>  |                  |
| chr1 | 208023240 | 208023362 | 123 | C1orf74  | <b>Exon 2</b>  |                  |
| chr1 | 208023377 | 208023501 | 125 | C1orf74  | <b>Exon 2</b>  |                  |
| chr1 | 208023517 | 208023586 | 70  | C1orf74  | <b>Exon 2</b>  |                  |
| chr1 | 208025534 | 208025558 | 25  |          | Intergenic     |                  |
| chr1 | 208025730 | 208025754 | 25  |          | Intergenic     |                  |
| chr1 | 208025763 | 208025788 | 26  |          | Intergenic     |                  |
| chr1 | 208027706 | 208027778 | 73  | IRF6     | <b>3' UTR</b>  | <b>3' of ex9</b> |
| chr1 | 208027805 | 208027905 | 101 | IRF6     | <b>3' UTR</b>  | <b>3' of ex9</b> |
| chr1 | 208027929 | 208027983 | 55  | IRF6     | <b>3' UTR</b>  | <b>3' of ex9</b> |
| chr1 | 208028208 | 208028245 | 38  | IRF6     | <b>3' UTR</b>  |                  |
| chr1 | 208028299 | 208028366 | 68  | IRF6     | <b>3' UTR</b>  |                  |
| chr1 | 208028388 | 208028635 | 248 | IRF6     | <b>Exon 9</b>  |                  |
| chr1 | 208029618 | 208029772 | 155 | IRF6     | <b>Exon 8</b>  |                  |
| chr1 | 208030448 | 208030881 | 434 | IRF6     | <b>Exon 7</b>  |                  |
| chr1 | 208030908 | 208031027 | 120 | IRF6     | Intron 6       | <b>Intron 6</b>  |
| chr1 | 208031399 | 208031430 | 32  | IRF6     | Intron 6       | <b>Intron 6</b>  |
| chr1 | 208032062 | 208032091 | 30  | IRF6     | Intron 6       | <b>Intron 6</b>  |
| chr1 | 208032223 | 208032411 | 189 | IRF6     | <b>Exon 6</b>  |                  |
| chr1 | 208033080 | 208033104 | 25  | IRF6     | Intron 5       |                  |
| chr1 | 208035243 | 208035405 | 163 | IRF6     | <b>Exon 5</b>  |                  |
| chr1 | 208036291 | 208036537 | 247 | IRF6     | <b>Exon 4</b>  |                  |
| chr1 | 208041187 | 208041395 | 209 | IRF6     | <b>Exon 3</b>  |                  |

|      |           |           |     |           |            |           |
|------|-----------|-----------|-----|-----------|------------|-----------|
| chr1 | 208041417 | 208041445 | 29  | IRF6      | Intron 2   | Intron 2  |
| chr1 | 208041470 | 208041533 | 64  | IRF6      | Intron 2   | Intron 2  |
| chr1 | 208041535 | 208041702 | 168 | IRF6      | Intron 2   | Intron 2  |
| chr1 | 208041738 | 208041792 | 55  | IRF6      | Intron 2   | Intron 2  |
| chr1 | 208042136 | 208042160 | 25  | IRF6      | Intron 1   | Intron 1e |
| chr1 | 208042285 | 208042329 | 45  | IRF6      | Intron 1   | Intron 1d |
| chr1 | 208042460 | 208042492 | 33  | IRF6      | Intron 1   | Intron 1c |
| chr1 | 208042523 | 208042552 | 30  | IRF6      | Intron 1   | Intron 1b |
| chr1 | 208042896 | 208043008 | 113 | IRF6      | Intron 1   | Intron 1b |
| chr1 | 208045290 | 208045348 | 59  | IRF6      | Intron 1   | Intron 1a |
| chr1 | 208045353 | 208045380 | 28  | IRF6      | Intron 1   | Intron 1a |
| chr1 | 208045404 | 208045428 | 25  | IRF6      | Intron 1   | Intron 1a |
| chr1 | 208046058 | 208046115 | 58  | IRF6      | 5' UTR     | Promoter  |
| chr1 | 208046147 | 208046180 | 34  |           | Intergenic | Promoter  |
| chr1 | 208048220 | 208048249 | 30  |           | Intergenic | MCS-2     |
| chr1 | 208048321 | 208048346 | 26  |           | Intergenic | MCS-2     |
| chr1 | 208049711 | 208049764 | 54  |           | Intergenic | MCS-3.6   |
| chr1 | 208054851 | 208054881 | 31  |           | Intergenic | MCS-8.7   |
| chr1 | 208055903 | 208055934 | 32  |           | Intergenic | MCS-9.7   |
| chr1 | 208055954 | 208055982 | 29  |           | Intergenic | MCS-9.7   |
| chr1 | 208055984 | 208056015 | 32  |           | Intergenic | MCS-9.7   |
| chr1 | 208056021 | 208056086 | 66  |           | Intergenic | MCS-9.7   |
| chr1 | 208056089 | 208056117 | 29  |           | Intergenic | MCS-9.7   |
| chr1 | 208056146 | 208056264 | 119 |           | Intergenic | MCS-9.7   |
| chr1 | 208056545 | 208056572 | 28  |           | Intergenic |           |
| chr1 | 208057206 | 208057241 | 36  |           | Intergenic | MCS-11    |
| chr1 | 208057248 | 208057297 | 50  |           | Intergenic | MCS-11    |
| chr1 | 208057300 | 208057345 | 46  |           | Intergenic | MCS-11    |
| chr1 | 208063651 | 208063675 | 25  |           | Intergenic |           |
| chr1 | 208065985 | 208066019 | 35  |           | Intergenic | MCS-20    |
| chr1 | 208066036 | 208066069 | 34  |           | Intergenic | MCS-20    |
| chr1 | 208066184 | 208066229 | 46  |           | Intergenic | MCS-20    |
| chr1 | 208067893 | 208067921 | 29  |           | Intergenic | MCS-20    |
| chr1 | 208068024 | 208068144 | 121 | C10orf107 | Exon 1     |           |
| chr1 | 208070062 | 208070126 | 65  | C10orf107 | Exon 2     |           |
| chr1 | 208070758 | 208070836 | 79  | C10orf107 | Exon 3     |           |
| chr1 | 208070838 | 208070887 | 50  | C10orf107 | Exon 3     |           |
| chr1 | 208070892 | 208070918 | 27  | C10orf107 | Exon 3     |           |
| chr1 | 208073228 | 208073300 | 73  | C10orf107 | Exon 4     |           |
| chr1 | 208075028 | 208075123 | 96  | C10orf107 | Exon 5     |           |
| chr1 | 208076792 | 208076933 | 142 | C10orf107 | Exon 6     |           |
| chr1 | 208076936 | 208077014 | 79  | C10orf107 | Exon 6     |           |
| chr1 | 208077016 | 208077199 | 184 | C10orf107 | Exon 6     |           |
| chr1 | 208078876 | 208079106 | 231 | C10orf107 | Exon 7     |           |
| chr1 | 208080818 | 208081038 | 221 | C10orf107 | Exon 8     |           |
| chr1 | 208081250 | 208081276 | 27  | C10orf107 | Intron 7   |           |
| chr1 | 208081911 | 208081936 | 26  | C10orf107 | Intron 7   |           |
| chr1 | 208082226 | 208082405 | 180 | C10orf107 | Exon 9     |           |
| chr1 | 208082541 | 208082672 | 132 | C10orf107 | Exon 10    |           |
| chr1 | 208083410 | 208083675 | 266 | C10orf107 | Exon 11    |           |
| chr1 | 208085367 | 208085422 | 56  | C10orf107 | Intron 11  |           |
| chr1 | 208090660 | 208090684 | 25  | C10orf107 | Intron 11  |           |
| chr1 | 208090759 | 208090783 | 25  | C10orf107 | Intron 11  |           |
| chr1 | 208091167 | 208091226 | 60  | C10orf107 | Intron 11  |           |

|      |           |           |     |           |                |               |
|------|-----------|-----------|-----|-----------|----------------|---------------|
| chr1 | 208091234 | 208091378 | 145 | C10orf107 | <b>Exon 12</b> |               |
| chr1 | 208091381 | 208091417 | 37  | C10orf107 | <b>3'UTR</b>   |               |
| chr1 | 208093906 | 208093930 | 25  | C10orf107 | <b>3'UTR</b>   |               |
| chr1 | 208094401 | 208094439 | 39  | C10orf107 | <b>3'UTR</b>   |               |
| chr1 | 208095674 | 208095710 | 37  | C10orf107 | <b>3'UTR</b>   |               |
| chr1 | 208095781 | 208095822 | 42  | C10orf107 | <b>3'UTR</b>   |               |
| chr1 | 208100450 | 208100474 | 25  |           | Intergenic     |               |
| chr1 | 208110108 | 208110224 | 117 |           | Intergenic     |               |
| chr1 | 208110613 | 208110639 | 27  |           | Intergenic     |               |
| chr1 | 208114828 | 208114853 | 26  |           | Intergenic     |               |
| chr1 | 208115780 | 208115839 | 60  |           | Intergenic     | <b>MCS-70</b> |
| chr1 | 208115852 | 208115925 | 74  |           | Intergenic     | <b>MCS-70</b> |
| chr1 | 208117024 | 208117068 | 45  |           | Intergenic     |               |
| chr1 | 208117089 | 208117161 | 73  |           | Intergenic     |               |
| chr1 | 208117274 | 208117333 | 60  |           | Intergenic     |               |
| chr1 | 208118904 | 208118930 | 27  |           | Intergenic     |               |
| chr1 | 208119560 | 208119587 | 28  |           | Intergenic     |               |
| chr1 | 208119594 | 208119620 | 27  |           | Intergenic     |               |
| chr1 | 208119791 | 208119841 | 51  |           | Intergenic     |               |
| chr1 | 208119843 | 208119935 | 93  |           | Intergenic     |               |
| chr1 | 208119973 | 208120068 | 96  |           | Intergenic     |               |
| chr1 | 208120134 | 208120166 | 33  |           | Intergenic     |               |
| chr1 | 208123752 | 208123815 | 64  |           | Intergenic     |               |
| chr1 | 208123820 | 208123961 | 142 |           | Intergenic     |               |
| chr1 | 208124932 | 208124977 | 46  |           | Intergenic     |               |
| chr1 | 208125027 | 208125176 | 150 |           | Intergenic     |               |
| chr1 | 208130888 | 208130985 | 98  |           | Intergenic     |               |
| chr1 | 208131005 | 208131099 | 95  |           | Intergenic     |               |
| chr1 | 208131116 | 208131141 | 26  |           | Intergenic     |               |
| chr1 | 208131167 | 208131201 | 35  |           | Intergenic     |               |
| chr1 | 208131255 | 208131279 | 25  |           | Intergenic     |               |
| chr1 | 208140659 | 208140683 | 25  |           | Intergenic     |               |
| chr1 | 208141344 | 208141382 | 39  |           | Intergenic     |               |
| chr1 | 208141562 | 208141592 | 31  |           | Intergenic     |               |
| chr1 | 208141632 | 208141662 | 31  |           | Intergenic     |               |
| chr1 | 208141701 | 208141748 | 48  |           | Intergenic     |               |
| chr1 | 208142717 | 208142748 | 32  |           | Intergenic     |               |
| chr1 | 208149761 | 208149807 | 47  |           | Intergenic     |               |
| chr1 | 208154475 | 208154507 | 33  |           | Intergenic     |               |
| chr1 | 208155316 | 208155341 | 26  |           | Intergenic     |               |
| chr1 | 208162548 | 208162578 | 31  |           | Intergenic     |               |
| chr1 | 208163109 | 208163137 | 29  |           | Intergenic     |               |
| chr1 | 208166239 | 208166277 | 39  |           | Intergenic     |               |
| chr1 | 208166310 | 208166397 | 88  |           | Intergenic     |               |
| chr1 | 208166402 | 208166435 | 34  |           | Intergenic     |               |
| chr1 | 208166536 | 208166567 | 32  |           | Intergenic     |               |
| chr1 | 208167018 | 208167042 | 25  |           | Intergenic     |               |
| chr1 | 208167376 | 208167402 | 27  |           | Intergenic     |               |
| chr1 | 208167444 | 208167480 | 37  |           | Intergenic     |               |
| chr1 | 208167553 | 208167584 | 32  |           | Intergenic     |               |
| chr1 | 208174860 | 208174886 | 27  |           | Intergenic     |               |
| chr1 | 208174975 | 208174999 | 25  |           | Intergenic     |               |
| chr1 | 208175046 | 208175083 | 38  |           | Intergenic     |               |
| chr1 | 208175184 | 208175234 | 51  |           | Intergenic     |               |

|      |           |           |     |        |               |
|------|-----------|-----------|-----|--------|---------------|
| chr1 | 208176970 | 208176999 | 30  |        | Intergenic    |
| chr1 | 208177001 | 208177078 | 78  |        | Intergenic    |
| chr1 | 208178207 | 208178255 | 49  | sytXIV | <b>Exon 1</b> |
| chr1 | 208182285 | 208182310 | 26  | sytXIV | Intron 1      |
| chr1 | 208183980 | 208184004 | 25  | sytXIV | Intron 1      |
| chr1 | 208188414 | 208188445 | 32  | sytXIV | Intron 1      |
| chr1 | 208188480 | 208188510 | 31  | sytXIV | Intron 1      |
| chr1 | 208192660 | 208192740 | 81  | sytXIV | <b>Exon 2</b> |
| chr1 | 208192928 | 208192968 | 41  | sytXIV | Intron 2      |
| chr1 | 208192972 | 208193117 | 146 | sytXIV | intron 2      |
| chr1 | 208193129 | 208193212 | 84  | sytXIV | Intron 2      |
| chr1 | 208193214 | 208193311 | 98  | sytXIV | Intron 2      |
| chr1 | 208193799 | 208193823 | 25  | sytXIV | Intron 2      |
| chr1 | 208202374 | 208202412 | 39  | sytXIV | Intron 2      |
| chr1 | 208202516 | 208202567 | 52  | sytXIV | Intron 2      |
| chr1 | 208202579 | 208202604 | 26  | sytXIV | Intron 2      |
| chr1 | 208229701 | 208229746 | 46  | sytXIV | Intron 3      |
| chr1 | 208230500 | 208230543 | 44  | sytXIV | Intron 3      |
| chr1 | 208246492 | 208246553 | 62  | sytXIV | Intron 3      |
| chr1 | 208251644 | 208251668 | 25  | sytXIV | Intron 3      |
| chr1 | 208253595 | 208253737 | 143 | sytXIV | <b>Exon 4</b> |
| chr1 | 208253740 | 208253775 | 36  | sytXIV | Intron 4      |
| chr1 | 208255607 | 208255647 | 41  | sytXIV | Intron 4      |
| chr1 | 208255666 | 208255707 | 42  | sytXIV | Intron 4      |
| chr1 | 208255744 | 208255771 | 28  | sytXIV | Intron 4      |
| chr1 | 208255868 | 208255900 | 33  | sytXIV | Intron 4      |
| chr1 | 208255916 | 208255956 | 41  | sytXIV | Intron 4      |
| chr1 | 208255958 | 208255985 | 28  | sytXIV | Intron 4      |
| chr1 | 208257054 | 208257086 | 33  | sytXIV | Intron 4      |
| chr1 | 208260994 | 208261065 | 72  | sytXIV | <b>Exon 5</b> |
| chr1 | 208261082 | 208261107 | 26  | sytXIV | <b>Exon 5</b> |
| chr1 | 208266579 | 208266616 | 38  | sytXIV | Intron 5      |

\*Coordinates are given according to UCSC Human Genome Browser Bld 36.1 (March 2006)

\*\*Multiple and closely arranged MCSs were amplified in single amplicons

(see **Supplementary Table 4** for sequenced regions and primers used)

*IRF6* coding sequences are highlighted in yellow

MCS-9.7 is highlighted in red

**Supplementary Table 2: Worldwide distribution of rs642961 allele frequencies determined from CEHP Human Genome Diversity Panel, <http://www.cephb.fr/HGDP-CEPH-Panel/>**

| Region                       | Population     | rs642961-G | rs642961-A | Total      | G-freq      | A-freq      |
|------------------------------|----------------|------------|------------|------------|-------------|-------------|
| Central African Republic     | Biaka Pygmies  | 67         | 3          | 70         | 0.96        | 0.04        |
| Democratic Republic of Congo | Mbuti Pygmies  | 18         | 12         | 30         | 0.60        | 0.40        |
| Senegal                      | Mandenka       | 40         | 6          | 46         | 0.87        | 0.13        |
| Nigeria                      | Yoruba         | 48         | 2          | 50         | 0.96        | 0.04        |
| Kenya                        | Bantu N.E.     | 24         | 0          | 24         | 1.00        | 0.00        |
| Namidia                      | San            | 14         | 0          | 14         | 1.00        | 0.00        |
| South Africa                 | Bantu          | 15         | 1          | 16         | 0.94        | 0.06        |
| Algeria (Mzab)               | Mozabite       | 50         | 10         | 60         | 0.83        | 0.17        |
| <b>AFRICA</b>                |                | <b>276</b> | <b>34</b>  | <b>310</b> | <b>0.89</b> | <b>0.11</b> |
| Israel                       | Bedouin        | 79         | 19         | 98         | 0.81        | 0.19        |
| Israel                       | Druze          | 79         | 15         | 94         | 0.84        | 0.16        |
| Israel                       | Palestinian    | 84         | 18         | 102        | 0.82        | 0.18        |
| Pakistan                     | Brahui         | 34         | 16         | 50         | 0.68        | 0.32        |
| Pakistan                     | Balochi        | 40         | 10         | 50         | 0.80        | 0.20        |
| Pakistan                     | Hazara         | 42         | 8          | 50         | 0.84        | 0.16        |
| Pakistan                     | Makrani        | 40         | 10         | 50         | 0.80        | 0.20        |
| Pakistan                     | Sindhi         | 38         | 12         | 50         | 0.76        | 0.24        |
| Pakistan                     | Pathan         | 39         | 11         | 50         | 0.78        | 0.22        |
| Pakistan                     | Kalash         | 35         | 15         | 50         | 0.70        | 0.30        |
| Pakistan                     | Barusho        | 39         | 11         | 50         | 0.78        | 0.22        |
| <b>PAKISTAN</b>              |                | <b>307</b> | <b>93</b>  | <b>400</b> | <b>0.77</b> | <b>0.23</b> |
| China                        | Han            | 70         | 18         | 88         | 0.80        | 0.20        |
| China                        | Tujia          | 13         | 7          | 20         | 0.65        | 0.35        |
| China                        | Yizu           | 19         | 1          | 20         | 0.95        | 0.05        |
| China                        | Miaozu         | 16         | 4          | 20         | 0.80        | 0.20        |
| China                        | Oroqen         | 17         | 3          | 20         | 0.85        | 0.15        |
| China                        | Daur           | 17         | 3          | 20         | 0.85        | 0.15        |
| China                        | Mongola        | 17         | 3          | 20         | 0.85        | 0.15        |
| China                        | Hezhen         | 16         | 4          | 20         | 0.80        | 0.20        |
| China                        | Xibo           | 13         | 6          | 19         | 0.68        | 0.32        |
| China                        | Uygur          | 17         | 3          | 20         | 0.85        | 0.15        |
| China                        | Lahu           | 16         | 4          | 20         | 0.80        | 0.20        |
| China                        | She            | 17         | 3          | 20         | 0.85        | 0.15        |
| China                        | Naxi           | 16         | 4          | 20         | 0.80        | 0.20        |
| China                        | Tu             | 14         | 6          | 20         | 0.70        | 0.30        |
| <b>CHINA</b>                 |                | <b>278</b> | <b>69</b>  | <b>347</b> | <b>0.80</b> | <b>0.20</b> |
| Siberia                      | Yakut          | 35         | 13         | 48         | 0.73        | 0.27        |
| Japan                        | Japanese       | 54         | 8          | 62         | 0.87        | 0.13        |
| Cambodia                     | Cambodian      | 18         | 4          | 22         | 0.82        | 0.18        |
| New Guinea                   | Papuan         | 26         | 8          | 34         | 0.76        | 0.24        |
| Bougainville                 | NAN Melanesian | 31         | 13         | 44         | 0.70        | 0.30        |
| France                       | Frence         | 49         | 9          | 58         | 0.84        | 0.16        |
| France                       | French Basque  | 30         | 10         | 40         | 0.75        | 0.25        |
| Italy                        | Sardinian      | 44         | 12         | 56         | 0.79        | 0.21        |
| Italy                        | North Italian  | 27         | 1          | 28         | 0.96        | 0.04        |
| Italy                        | Tuscan         | 11         | 5          | 16         | 0.69        | 0.31        |
| Orkney Islands               | Orcadian       | 28         | 4          | 32         | 0.88        | 0.13        |
| Russia Caucasus              | Adygei         | 24         | 6          | 30         | 0.80        | 0.20        |
| Russia                       | Russian        | 42         | 6          | 48         | 0.88        | 0.13        |
| Colombia                     | Colombian      | 23         | 3          | 26         | 0.88        | 0.12        |
| Mexico                       | Pima           | 37         | 13         | 50         | 0.74        | 0.26        |
| Mexico                       | Maya           | 35         | 15         | 50         | 0.70        | 0.30        |
| Brazil                       | Karitiana      | 34         | 14         | 48         | 0.71        | 0.29        |
| Brazil                       | Surui          | 32         | 10         | 42         | 0.76        | 0.24        |
| <b>NATIVE AMERICAN</b>       |                | <b>138</b> | <b>52</b>  | <b>190</b> | <b>0.73</b> | <b>0.27</b> |

**Supplementary Table 3: *IRF6* locus coordinates and genome assemblies**

| <b>Organism</b> | <b>UCSC Genome Browser coordinates</b>       | <b>Build</b>  |
|-----------------|----------------------------------------------|---------------|
| Human           | chr1:207786994-208286993                     | March 2006    |
| Chimp           | chr1:189982478-190486018                     | March 2006    |
| Rhesus          | chr1:160355582-160859543                     | January 2006  |
| Rat             | chr13:108826445-109255967                    | November 2004 |
| Mouse           | chr1:194795892-195233688                     | July 2006     |
| Dog             | chr7:11156498-11636370                       | May 2005      |
| Cow             | chr16:67677502-67941385                      | August 2006   |
| Cat             | scaffold_129274:24555-91072                  | March 2006    |
| Tenrec          | scaffold_124:63192-75668 ( <i>Ensemble</i> ) | October 2007  |
| Opossum         | chr2:116773085-117442209                     | January 2006  |
| Chicken         | chr3:23923223-24003837                       | May 2006      |
|                 | chr26:2926576-2995482                        | May 2006      |
| Frog            | scaffold_375:789749-797232                   | August 2005   |
|                 | scaffold_61:1446322-1455782                  | August 2005   |
| Tetraodon       | chr11:5978227-5980600                        | February 2004 |

UCSC Genome Browser: <http://www.genome.ucsc.edu/>

Ensemble: <http://www.ensembl.org/index.html>

**BAC clones from organisms sequenced by the NIH Intramural Sequencing Center (NISC)**

| <b>Organism</b>         | <b>Clone name</b> | <b>GenBank ID</b> |
|-------------------------|-------------------|-------------------|
| Rabbit                  | LB1-121D24        | AC173439          |
| Rabbit                  | LB1-183A3         | AC164495          |
| Rabbit                  | LB1-183H5         | AC163952          |
| Rabbit                  | LB1-289D12        | AC166022          |
| Pig                     | RP44-357O11       | AC164944          |
| Pig                     | RP44-274O19       | AC166031          |
| Pig                     | RP44-55L3         | AC167303          |
| Pig                     | RP44-327E16       | AC164503          |
| Bat (greater horseshoe) | VMRC7-303M11      | AC163982          |
| Bat (greater horseshoe) | VMRC7-280A9       | AC164951          |
| Bat (greater horseshoe) | VMRC7-285O13      | AC165214          |
| Bat (greater horseshoe) | VMRC7-212E18      | AC167528          |
| Armadillo (nine-banded) | VMRC5-471F9       | AC169168          |
| Armadillo (nine-banded) | VMRC5-148P11      | AC171392          |
| Armadillo (nine-banded) | VMRC5-151G4       | AC164515          |
| Elephant (African)      | VMRC15-220O23     | AC166032          |
| Elephant (African)      | VMRC15-370J11     | AC164528          |
| Elephant (African)      | VMRC15-554C21     | AC164513          |
| Elephant (African)      | VMRC15-515M5      | AC164512          |

BAC sequence data can also be accessed at:

[http://www.nisc.nih.gov/open\\_page.cgi?path=/projects/comp\\_seq.html](http://www.nisc.nih.gov/open_page.cgi?path=/projects/comp_seq.html)

**Supplementary Table 4: Primers used to amplify *IRF6* Multispecies Conserved Sequences (MCSs)**

| <b>MCS</b>  | <b>Forward Primer</b>            | <b>Reverse Primer</b>            | <b>UCSC hg18 coordinates</b>    |
|-------------|----------------------------------|----------------------------------|---------------------------------|
| -70         | CATCAGAAAGGAGGGAGCAG             | AAGGGCATTGCCAAAATATG             | chr1:208115704-208115964        |
| -20         | GGGTGGGGCTAGGGTAAAT              | ATTCCTAATTAGATTCGGAGAGG          | chr1:208065913-208066382        |
| -11         | TATACCCCTGCCTTGACCTG             | AGAGTGTGGTGGGGATTTC              | chr1:208057098-208057400        |
| <b>-9.7</b> | <b>CTCCTCTGTTTGCTTAGCTTACCTC</b> | <b>CTGGTAAATGGTGAGTAGGAAGTTG</b> | <b>chr1:208055755-208056361</b> |
| -8.7        | ATGTCCTGTGCATGACTCCA             | GTCACCCCAGGGAATTAAGC             | chr1:208054738-208055007        |
| -3.6        | CCACAAGCTCTTGAGGAATCA            | GAGAGTGGGATTTGGGTTC              | chr1:208049592-208049937        |
| -2          | GTTGAAGAGCCCCAGATTGA             | TCCAGGGCACTTGACTCTTT             | chr1:208048091-208048702        |
| Promoter    | CGTACCCACCTTTGCTCAAT             | CCAACCCAGAATCTCAAACC             | chr1:208045906-208046469        |
| Intron 1a   | TGAGTGCCACTGTCATACATC            | CCAGGAGCTTTGGAGCATT              | chr1:208045041-208045487        |
| Intron 1b   | GGCCAATAAAGTGATTGAGG             | GCGTGTGTTTTAACCTGAGC             | chr1:208044398-208044837        |
| Intron 1c   | TAAGGCAATCAGGCCAAGAC             | CAGTCAAGTTGTATGCTGTTCC           | chr1:208043409-208043868        |
| Intron 1d   | AGGTCACCTTCATACCCAGAAA           | TAGTGATAGGACTGGGGAGCA            | chr1:208042669-208043188        |
| Intron 1e   | GAGAAGGCTTGGGAACACTG             | CATTGTGGGGCTTGAGAAGT             | chr1:208042070-208042643        |
| Intron 2    | AGGGCTTTAGCCGGACTCT              | CCCATTACCTTTAGTTGTCTTG           | chr1:208041345-208041856        |
| Intron 6    | AGAGTCGGCAGCCCTGAG               | TTTAGCTCCTTCCAATGACCA            | chr1:208030769-208031193        |
| 3' of ex9   | AGGCTAAACTGCCTGGAACA             | CTGTACCTACCCCTCTCC               | chr1:208027559-208027969        |
| 28.3        | TTTTAGCCCATCCCTCTGG              | TCTTCGTGCCAGTTCTGA               | chr1:208017687-208017948        |

UCSC Genome Browser: <http://www.genome.ucsc.edu/>

MCSs are identified by their distance in kilobases from *IRF6* transcription start site (chr1:208046102 UCSC hg18)

#### Primers used in Chromatin Immunoprecipitation (ChIP) assay

| <b>Amplicon</b>   | <b>Forward Primer</b>    | <b>Reverse Primer</b>    | <b>UCSC hg18 coordinates</b> |
|-------------------|--------------------------|--------------------------|------------------------------|
| Target in MCS-9.7 | GATTGGAGCTTTGGAATGTTAATC | ACAGAATAGTAACTGGGAGGTTGC | chr1:208055840-208056093     |
| Control region    | GAATAATTTGTGACAACTGCCTTG | AATTTGAGGAGAGTAGACCACCAG | chr1:208022115-208022373     |

**Supplementary Figure 1 Legend:** Multispecies sequence alignment of the MCS-9.7 segment corresponding to nucleotides from –14470 to –14654 with respect to *IRF6* translation initiation site, that contains four putative AP-2 $\alpha$  binding sites (highlighted in yellow) predicted by the TESS software <http://www.cbil.upenn.edu/tess>. Variants -14474A>G, rs642961 (G>A) and -14523G>A, are indicated by vertical arrows.





**Supplementary Figure 2.** Analysis of MCS-9.7 regulatory activity in HFK cell line using luciferase reporter assay. Bars represent mean  $\pm$  SEM of the luciferase activity data from seven independent experiments performed in triplicates (21 data points total). GGA and AGG are the non-associated haplotype constructs; AAG is the risk haplotype construct. SV40, luciferase expression driven by the SV40 promoter alone.

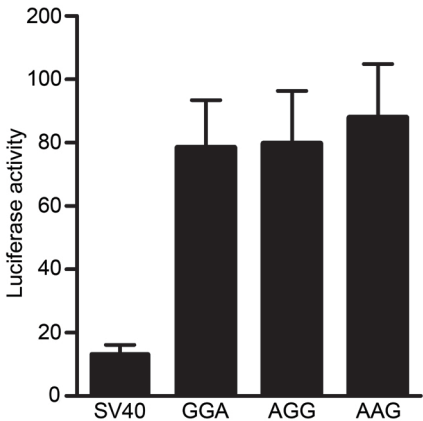

Supplement: NIHMS67305-supplement-1.pdf [file NIHMS67305-supplement-1.pdf]
