# Supplementary material
Source: PubMed Central journal article supplement (PMC2691688)
Supplement: NIHMS67305-supplement-2.pdf [file NIHMS67305-supplement-2.pdf]

## **Supplementary methods**

### **Comparative genomic sequence analysis**

MultiPipMaker, <http://pipmaker.bx.psu.edu/pipmaker>

WebMCS, <http://zoo.nhgri.nih.gov/mcs>

### **Sequencing**

Primer 3, <http://fokker.wi.mit.edu/primer3/input.htm>

### **Electrophoretic mobility shift assay (EMSA)**

Infrared dye (IRDye-700) end-labeled and unlabeled oligonucleotide probes were purchased from LI-COR Biosciences (Lincoln, NE) and IDT (Coralville, IA), respectively. We performed EMSAs by using the LI-COR EMSA Kit. Briefly, 6 $\mu$ g of human recombinant AP-2 $\alpha$  protein (Promega) was incubated with 2.5nM of labeled probe in 20 $\mu$ l binding reaction for 20 min at 4 $^{\circ}$ C. Each binding reaction contained 2 $\mu$ l of LI-COR 10X binding buffer, 2.5mM DTT, 2.5% Tween-20 and 1%NP-40. To prevent nonspecific binding, 1 $\mu$ g of poly(dI-dC) and 0.1 $\mu$ g of shared salmon sperm DNA were added to each reaction. The samples were then electrophoresed for 2.5 hours at 280V in 0.5XTBE buffer on an 8% polyacrylamide gel at 4 $^{\circ}$ C following pre-run of the gels for 1hr at 200V. The gel was then visualized by Odyssey<sup>®</sup> Infrared Imaging System (LI-COR). For competition experiments, a 50-, 100-, and 200-fold molar excess of unlabeled competitor oligonucleotide probe was incubated for 20min before addition of the labeled probe. For supershift assay, 3 $\mu$ l of anti-AP-2 $\alpha$  antibody (Upstate Biotechnology) was incubated for 20 min at 4 $^{\circ}$ C prior to the addition of the labeled probe.

## Chromatin immunoprecipitation (ChIP) assay

Protein cross-linked chromatin from  $\sim 2 \times 10^7$  Ad-AP-2 $\alpha$ -infected and uninfected HaCaT keratinocyte cells was isolated as detailed previously<sup>1</sup>. A small amount of the chromatin sample was removed as input control, while the remainder was split into two equal parts and immunoprecipitated with 10 $\mu$ g of anti-AP-2 $\alpha$  antibody or control mouse IgG overnight at 4°C with agitation.

Chromatin/antibody complexes were then collected using Protein G agarose followed by washing and elution according to the manufacturer's instructions.

DNA was then purified from input chromatin and immunoprecipitation elutions by reversing crosslinks using 200mM NaCl at 65°C for 4 hr followed by the Qiagen DNeasy Kit according to manufacturer's protocol. The amount of

immunoprecipitated target region was determined by SYBR Green (Applied Biosystems) quantitative real-time PCR with primers for the target sequence in MCS-9.7 and control region (**Supplementary Table 4**) at a final concentration of 100nM. Specific amplification of the target sequences were tested on agarose gel. Real-time PCR was carried out in triplicate on 5ng of DNA under the following conditions: 10 min denaturation at 95°C, followed by 40 cycles of 95°C for 10 sec and 60°C for 30 sec. Amplification of the target amplicon was monitored as a function of increased SYBR Green fluorescence. An analysis threshold was set and the cycle threshold ( $C_t$ ) computed for each sample. Fold enrichment of target sequence was calculated using the following formula (Fold enrichment =  $2^{(C_t \text{ AP-2}\alpha\text{-Ab IPed}) - (C_t \text{ IgG IPed})}$ ).

## Luciferase reporter assay

For luciferase reporter assay we generated reporter constructs by inserting 540bp genomic segment (chr1:208055787-208056326, UCSC hg18) containing the entire MCS-9.7Kb region upstream of firefly luciferase open reading frame (ORF) driven by the SV40 promoter. DNA samples from individuals homozygous for -14474A>G, -14523G>A, and rs642961 variants were PCR amplified and cloned into the pGL3-Basic and pGL3-Promoter vectors (Promega) in both orientations. HFK cells were seeded in 12-well plates at  $\sim 4 \times 10^7$  cells/well density in 1mL of K-SFM media supplemented with rEGF (0.16ng/mL) and BPE (25 $\mu$ g/mL) 24 hours prior to transfection. These cells were then cotransfected with 1 $\mu$ g of reporter construct and 20ng hRL-TK renilla luciferase plasmid using 2 $\mu$ g of Lipofectamine™ LTX reagent in 500 $\mu$ l of reduced-serum Opti-MEM® I media (Invitrogen). Dual Luciferase® Assay (Promega) was performed 24 hours after transfection according to manufacturer's protocol. The pGL3-Basic and pGL3-Promoter vectors were used as controls. Renilla luciferase was used as an internal control to normalize the firefly luciferase activity. Luciferase activity was measured with Wallac Victor<sup>2</sup> luminometer (PerkinElmer).

## References

1. Provenzano, M.J. *et al.* AP-2 participates in the transcriptional control of the amyloid precursor protein (APP) gene in oral squamous cell carcinoma. *Exp Mol Pathol* **83**, 277-282 (2007).
