# Supplementary material
Source: PubMed Central journal article supplement (PMC2691688)
Supplement: NIHMS67305-supplement-3.pdf [file NIHMS67305-supplement-3.pdf]

**Supplementary Table 1: Multispecies conserved sequences (MCSs)**

| <b>Chromosome</b> | <b>Start*</b> | <b>End*</b> | <b>Length (bp)</b> | <b>Gene</b> | <b>Location</b> | <b>Sequenced MCSs**</b> |
|-------------------|---------------|-------------|--------------------|-------------|-----------------|-------------------------|
| chr1              | 207788205     | 207788237   | 33                 |             | Intergenic      |                         |
| chr1              | 207788244     | 207788275   | 32                 |             | Intergenic      |                         |
| chr1              | 207789550     | 207789648   | 99                 |             | Intergenic      |                         |
| chr1              | 207796706     | 207796768   | 63                 |             | Intergenic      |                         |
| chr1              | 207796846     | 207796878   | 33                 |             | Intergenic      |                         |
| chr1              | 207796931     | 207796984   | 54                 |             | Intergenic      |                         |
| chr1              | 207797241     | 207797265   | 25                 |             | Intergenic      |                         |
| chr1              | 207797307     | 207797344   | 38                 |             | Intergenic      |                         |
| chr1              | 207797431     | 207797455   | 25                 |             | Intergenic      |                         |
| chr1              | 207797537     | 207797562   | 26                 |             | Intergenic      |                         |
| chr1              | 207801420     | 207801522   | 103                |             | Intergenic      |                         |
| chr1              | 207801526     | 207801551   | 26                 |             | Intergenic      |                         |
| chr1              | 207801554     | 207801598   | 45                 |             | Intergenic      |                         |
| chr1              | 207801625     | 207801669   | 45                 |             | Intergenic      |                         |
| chr1              | 207801704     | 207801756   | 53                 |             | Intergenic      |                         |
| chr1              | 207802642     | 207802673   | 32                 |             | Intergenic      |                         |
| chr1              | 207804077     | 207804109   | 33                 |             | Intergenic      |                         |
| chr1              | 207804937     | 207805044   | 108                |             | Intergenic      |                         |
| chr1              | 207809952     | 207809985   | 34                 |             | Intergenic      |                         |
| chr1              | 207815270     | 207815294   | 25                 |             | Intergenic      |                         |
| chr1              | 207816864     | 207816889   | 26                 |             | Intergenic      |                         |
| chr1              | 207818596     | 207818624   | 29                 |             | Intergenic      |                         |
| chr1              | 207823399     | 207823430   | 32                 |             | Intergenic      |                         |
| chr1              | 207823554     | 207823714   | 161                | CAMK1G      | <b>5' UTR</b>   |                         |
| chr1              | 207824257     | 207824283   | 27                 | CAMK1G      | Intron 1        |                         |
| chr1              | 207824412     | 207824438   | 27                 | CAMK1G      | Intron 1        |                         |
| chr1              | 207824532     | 207824589   | 58                 | CAMK1G      | Intron 1        |                         |
| chr1              | 207824685     | 207824711   | 27                 | CAMK1G      | Intron 1        |                         |
| chr1              | 207824841     | 207824874   | 34                 | CAMK1G      | Intron 1        |                         |
| chr1              | 207825701     | 207825729   | 29                 | CAMK1G      | Intron 1        |                         |
| chr1              | 207825732     | 207825757   | 26                 | CAMK1G      | Intron 1        |                         |
| chr1              | 207825769     | 207825835   | 67                 | CAMK1G      | Intron 1        |                         |
| chr1              | 207825862     | 207825889   | 28                 | CAMK1G      | Intron 1        |                         |
| chr1              | 207827641     | 207827665   | 25                 | CAMK1G      | Intron 1        |                         |
| chr1              | 207827849     | 207827886   | 38                 | CAMK1G      | Intron 1        |                         |
| chr1              | 207827888     | 207827916   | 29                 | CAMK1G      | Intron 1        |                         |
| chr1              | 207828777     | 207828805   | 29                 | CAMK1G      | Intron 1        |                         |
| chr1              | 207830410     | 207830556   | 147                | CAMK1G      | Intron 1        |                         |
| chr1              | 207834792     | 207834817   | 26                 | CAMK1G      | Intron 1        |                         |
| chr1              | 207834926     | 207835061   | 136                | CAMK1G      | <b>Exon 2</b>   |                         |
| chr1              | 207835888     | 207835913   | 26                 | CAMK1G      | Intron 2        |                         |
| chr1              | 207835939     | 207835966   | 28                 | CAMK1G      | Intron 2        |                         |
| chr1              | 207836637     | 207836663   | 27                 | CAMK1G      | Intron 2        |                         |
| chr1              | 207839947     | 207840095   | 149                | CAMK1G      | <b>Exon 3</b>   |                         |
| chr1              | 207840330     | 207840365   | 36                 | CAMK1G      | Intron 3        |                         |
| chr1              | 207843172     | 207843273   | 102                | CAMK1G      | <b>Exon 4</b>   |                         |
| chr1              | 207845494     | 207845653   | 160                | CAMK1G      | <b>Exon 5</b>   |                         |
| chr1              | 207846278     | 207846423   | 146                | CAMK1G      | <b>Exon 6</b>   |                         |
| chr1              | 207847819     | 207847915   | 97                 | CAMK1G      | <b>Exon 7</b>   |                         |
| chr1              | 207848968     | 207849072   | 105                | CAMK1G      | <b>Exon 8</b>   |                         |
| chr1              | 207849174     | 207849209   | 36                 | CAMK1G      | Intron 8        |                         |

|      |           |           |     |        |                |
|------|-----------|-----------|-----|--------|----------------|
| chr1 | 207849687 | 207849792 | 106 | CAMK1G | Intron 8       |
| chr1 | 207849810 | 207849892 | 83  | CAMK1G | <b>Exon 9</b>  |
| chr1 | 207851428 | 207851533 | 106 | CAMK1G | <b>Exon 10</b> |
| chr1 | 207851746 | 207851858 | 113 | CAMK1G | <b>Exon 11</b> |
| chr1 | 207851884 | 207851923 | 40  | CAMK1G | <b>Exon 11</b> |
| chr1 | 207851998 | 207852072 | 75  | CAMK1G | <b>Exon 11</b> |
| chr1 | 207852079 | 207852121 | 43  | CAMK1G | <b>Exon 11</b> |
| chr1 | 207852124 | 207852196 | 73  | CAMK1G | <b>Exon 11</b> |
| chr1 | 207852752 | 207852777 | 26  | CAMK1G | <b>Exon 12</b> |
| chr1 | 207852794 | 207852851 | 58  | CAMK1G | <b>Exon 12</b> |
| chr1 | 207853856 | 207853928 | 73  | CAMK1G | <b>3'UTR</b>   |
| chr1 | 207854856 | 207854892 | 37  | LAMB3  | <b>3'UTR</b>   |
| chr1 | 207855236 | 207855326 | 91  | LAMB3  | <b>Exon 22</b> |
| chr1 | 207855352 | 207855396 | 45  | LAMB3  | <b>Exon 22</b> |
| chr1 | 207856431 | 207856497 | 67  | LAMB3  | <b>Exon 21</b> |
| chr1 | 207856535 | 207856602 | 68  | LAMB3  | <b>Exon 21</b> |
| chr1 | 207857541 | 207857570 | 30  | LAMB3  | <b>Exon 20</b> |
| chr1 | 207857869 | 207857953 | 85  | LAMB3  | <b>Exon 19</b> |
| chr1 | 207857958 | 207857983 | 26  | LAMB3  | <b>Exon 19</b> |
| chr1 | 207858419 | 207858443 | 25  | LAMB3  | <b>Exon 18</b> |
| chr1 | 207858454 | 207858545 | 92  | LAMB3  | <b>Exon 18</b> |
| chr1 | 207858547 | 207858638 | 92  | LAMB3  | <b>Exon 18</b> |
| chr1 | 207858872 | 207858896 | 25  | LAMB3  | Intron 17      |
| chr1 | 207858922 | 207858960 | 39  | LAMB3  | Intron 17      |
| chr1 | 207859016 | 207859043 | 28  | LAMB3  | Intron 17      |
| chr1 | 207861480 | 207861507 | 28  | LAMB3  | Intron 17      |
| chr1 | 207861566 | 207861592 | 27  | LAMB3  | Intron 17      |
| chr1 | 207861599 | 207861627 | 29  | LAMB3  | Intron 17      |
| chr1 | 207862500 | 207862541 | 42  | LAMB3  | <b>Exon 17</b> |
| chr1 | 207862543 | 207862607 | 65  | LAMB3  | <b>Exon 17</b> |
| chr1 | 207862943 | 207863017 | 75  | LAMB3  | <b>Exon 16</b> |
| chr1 | 207863058 | 207863083 | 26  | LAMB3  | <b>Exon 16</b> |
| chr1 | 207863224 | 207863250 | 27  | LAMB3  | Intron 15      |
| chr1 | 207863467 | 207863503 | 37  | LAMB3  | <b>Exon 15</b> |
| chr1 | 207863575 | 207863612 | 38  | LAMB3  | <b>Exon 15</b> |
| chr1 | 207863627 | 207863654 | 28  | LAMB3  | <b>Exon 15</b> |
| chr1 | 207863675 | 207863701 | 27  | LAMB3  | <b>Exon 15</b> |
| chr1 | 207863803 | 207863860 | 58  | LAMB3  | <b>Exon 14</b> |
| chr1 | 207863879 | 207863907 | 29  | LAMB3  | <b>Exon 14</b> |
| chr1 | 207865140 | 207865167 | 28  | LAMB3  | Intron 13      |
| chr1 | 207865273 | 207865313 | 41  | LAMB3  | Intron 13      |
| chr1 | 207865636 | 207865664 | 29  | LAMB3  | <b>Exon 13</b> |
| chr1 | 207865825 | 207865954 | 130 | LAMB3  | <b>Exon 13</b> |
| chr1 | 207865971 | 207866003 | 33  | LAMB3  | <b>Exon 13</b> |
| chr1 | 207866834 | 207866902 | 69  | LAMB3  | <b>Exon 12</b> |
| chr1 | 207866905 | 207866954 | 50  | LAMB3  | <b>Exon 12</b> |
| chr1 | 207867347 | 207867396 | 50  | LAMB3  | <b>Exon 11</b> |
| chr1 | 207867401 | 207867518 | 118 | LAMB3  | <b>Exon 11</b> |
| chr1 | 207867526 | 207867554 | 29  | LAMB3  | <b>Exon 11</b> |
| chr1 | 207867790 | 207867819 | 30  | LAMB3  | Intron 10      |
| chr1 | 207867991 | 207868170 | 180 | LAMB3  | <b>Exon 10</b> |
| chr1 | 207869506 | 207869533 | 28  | LAMB3  | Intron 8       |
| chr1 | 207869698 | 207869726 | 29  | LAMB3  | <b>Exon 9</b>  |
| chr1 | 207869732 | 207869901 | 170 | LAMB3  | <b>Exon 9</b>  |

|      |           |           |     |       |               |
|------|-----------|-----------|-----|-------|---------------|
| chr1 | 207870581 | 207870606 | 26  | LAMB3 | <b>Exon 8</b> |
| chr1 | 207870610 | 207870711 | 102 | LAMB3 | <b>Exon 8</b> |
| chr1 | 207871136 | 207871173 | 38  | LAMB3 | Intron 7      |
| chr1 | 207871175 | 207871206 | 32  | LAMB3 | Intron 7      |
| chr1 | 207872604 | 207872749 | 146 | LAMB3 | <b>Exon 7</b> |
| chr1 | 207873029 | 207873072 | 44  | LAMB3 | <b>Exon 6</b> |
| chr1 | 207873077 | 207873106 | 30  | LAMB3 | <b>Exon 6</b> |
| chr1 | 207874441 | 207874488 | 48  | LAMB3 | <b>Exon 5</b> |
| chr1 | 207874515 | 207874598 | 84  | LAMB3 | <b>Exon 5</b> |
| chr1 | 207877073 | 207877101 | 29  | LAMB3 | Intron 4      |
| chr1 | 207877107 | 207877136 | 30  | LAMB3 | Intron 4      |
| chr1 | 207877287 | 207877314 | 28  | LAMB3 | Intron 4      |
| chr1 | 207877605 | 207877641 | 37  | LAMB3 | Intron 4      |
| chr1 | 207877897 | 207877969 | 73  | LAMB3 | <b>Exon 4</b> |
| chr1 | 207878496 | 207878539 | 44  | LAMB3 | <b>Exon 3</b> |
| chr1 | 207878541 | 207878633 | 93  | LAMB3 | <b>Exon 3</b> |
| chr1 | 207881708 | 207881756 | 49  | LAMB3 | Intron 2      |
| chr1 | 207881781 | 207881823 | 43  | LAMB3 | Intron 2      |
| chr1 | 207881868 | 207881927 | 60  | LAMB3 | Intron 2      |
| chr1 | 207883043 | 207883076 | 34  | LAMB3 | Intron 2      |
| chr1 | 207883312 | 207883336 | 25  | LAMB3 | Intron 2      |
| chr1 | 207883382 | 207883443 | 62  | LAMB3 | Intron 2      |
| chr1 | 207883470 | 207883504 | 35  | LAMB3 | Intron 2      |
| chr1 | 207885060 | 207885091 | 32  | LAMB3 | Intron 2      |
| chr1 | 207885778 | 207885802 | 25  | LAMB3 | Intron 2      |
| chr1 | 207885957 | 207886049 | 93  | LAMB3 | Intron 2      |
| chr1 | 207888446 | 207888499 | 54  | LAMB3 | Intron 2      |
| chr1 | 207888559 | 207888593 | 35  | LAMB3 | Intron 2      |
| chr1 | 207888959 | 207888983 | 25  | LAMB3 | Intron 2      |
| chr1 | 207889925 | 207890068 | 144 | LAMB3 | <b>Exon 2</b> |
| chr1 | 207892416 | 207892535 | 120 | LAMB3 | <b>5'UTR</b>  |
| chr1 | 207892538 | 207892562 | 25  |       | Intergenic    |
| chr1 | 207892880 | 207892907 | 28  |       | Intergenic    |
| chr1 | 207893095 | 207893121 | 27  |       | Intergenic    |
| chr1 | 207893167 | 207893216 | 50  |       | Intergenic    |
| chr1 | 207894019 | 207894055 | 37  |       | Intergenic    |
| chr1 | 207894069 | 207894093 | 25  |       | Intergenic    |
| chr1 | 207895926 | 207895955 | 30  |       | Intergenic    |
| chr1 | 207902976 | 207903001 | 26  |       | Intergenic    |
| chr1 | 207909098 | 207909128 | 31  |       | Intergenic    |
| chr1 | 207913313 | 207913348 | 36  |       | Intergenic    |
| chr1 | 207913388 | 207913412 | 25  |       | Intergenic    |
| chr1 | 207913607 | 207913642 | 36  |       | Intergenic    |
| chr1 | 207913674 | 207913698 | 25  |       | Intergenic    |
| chr1 | 207914025 | 207914085 | 61  |       | Intergenic    |
| chr1 | 207914678 | 207914712 | 35  |       | Intergenic    |
| chr1 | 207915652 | 207915708 | 57  | G0S2  | <b>Exon 2</b> |
| chr1 | 207915714 | 207915817 | 104 | G0S2  | <b>Exon 2</b> |
| chr1 | 207915931 | 207915966 | 36  | G0S2  | <b>Exon 2</b> |
| chr1 | 207916172 | 207916206 | 35  | G0S2  | <b>3'UTR</b>  |
| chr1 | 207916278 | 207916302 | 25  | G0S2  | <b>3'UTR</b>  |
| chr1 | 207916313 | 207916345 | 33  | G0S2  | <b>3'UTR</b>  |
| chr1 | 207923818 | 207923843 | 26  |       | Intergenic    |
| chr1 | 207924718 | 207924743 | 26  |       | Intergenic    |

|      |           |           |     |          |               |
|------|-----------|-----------|-----|----------|---------------|
| chr1 | 207925789 | 207925848 | 60  |          | Intergenic    |
| chr1 | 207925992 | 207926182 | 191 | HSD11B1  | <b>5' UTR</b> |
| chr1 | 207926395 | 207926421 | 27  | HSD11B1  | Intron 1      |
| chr1 | 207926515 | 207926574 | 60  | HSD11B1  | Intron 1      |
| chr1 | 207927152 | 207927190 | 39  | HSD11B1  | Intron 1      |
| chr1 | 207927313 | 207927367 | 55  | HSD11B1  | Intron 1      |
| chr1 | 207927440 | 207927464 | 25  | HSD11B1  | Intron 1      |
| chr1 | 207927490 | 207927517 | 28  | HSD11B1  | Intron 1      |
| chr1 | 207927732 | 207927758 | 27  | HSD11B1  | Intron 1      |
| chr1 | 207927809 | 207927833 | 25  | HSD11B1  | Intron 1      |
| chr1 | 207933050 | 207933086 | 37  | HSD11B1  | Intron 1      |
| chr1 | 207933442 | 207933466 | 25  | HSD11B1  | Intron 1      |
| chr1 | 207938125 | 207938187 | 63  | HSD11B1  | Intron 1      |
| chr1 | 207943482 | 207943507 | 26  | HSD11B1  | Intron 1      |
| chr1 | 207943514 | 207943585 | 72  | HSD11B1  | Intron 1      |
| chr1 | 207944194 | 207944223 | 30  | HSD11B1  | Intron 1      |
| chr1 | 207944233 | 207944264 | 32  | HSD11B1  | Intron 1      |
| chr1 | 207944271 | 207944319 | 49  | HSD11B1  | Intron 1      |
| chr1 | 207944369 | 207944421 | 53  | HSD11B1  | Intron 1      |
| chr1 | 207944445 | 207944469 | 25  | HSD11B1  | Intron 1      |
| chr1 | 207944597 | 207944886 | 290 | HSD11B1  | Intron 1      |
| chr1 | 207944911 | 207944948 | 38  | HSD11B1  | <b>Exon 2</b> |
| chr1 | 207944952 | 207944982 | 31  | HSD11B1  | <b>Exon 2</b> |
| chr1 | 207944984 | 207945008 | 25  | HSD11B1  | <b>Exon 2</b> |
| chr1 | 207945771 | 207945892 | 122 | HSD11B1  | <b>Exon 3</b> |
| chr1 | 207946675 | 207946798 | 124 | HSD11B1  | <b>Exon 4</b> |
| chr1 | 207946898 | 207946951 | 54  | HSD11B1  | <b>Exon 5</b> |
| chr1 | 207946986 | 207947089 | 104 | HSD11B1  | <b>Exon 5</b> |
| chr1 | 207948394 | 207948472 | 79  | HSD11B1  | Intron 5      |
| chr1 | 207948515 | 207948578 | 64  | HSD11B1  | Intron 5      |
| chr1 | 207963094 | 207963119 | 26  | HSD11B1  | Intron 5      |
| chr1 | 207969333 | 207969362 | 30  | HSD11B1  | Intron 5      |
| chr1 | 207972418 | 207972488 | 71  | HSD11B1  | <b>Exon 6</b> |
| chr1 | 207972498 | 207972562 | 65  | HSD11B1  | <b>Exon 6</b> |
| chr1 | 207974271 | 207974301 | 31  | HSD11B1  | <b>Exon 7</b> |
| chr1 | 207974311 | 207974389 | 79  | HSD11B1  | <b>Exon 7</b> |
| chr1 | 207974419 | 207974443 | 25  | HSD11B1  | <b>Exon 7</b> |
| chr1 | 207974781 | 207974838 | 58  | HSD11B1  | <b>3' UTR</b> |
| chr1 | 207987979 | 207988013 | 35  |          | Intergenic    |
| chr1 | 207995964 | 207996020 | 57  |          | Intergenic    |
| chr1 | 207996028 | 207996063 | 36  | TRAF3IP3 | <b>5' UTR</b> |
| chr1 | 207996065 | 207996120 | 56  | TRAF3IP3 | <b>5' UTR</b> |
| chr1 | 207996199 | 207996245 | 47  | TRAF3IP3 | <b>5' UTR</b> |
| chr1 | 207996275 | 207996305 | 31  | TRAF3IP3 | <b>5' UTR</b> |
| chr1 | 207997859 | 207997883 | 25  | TRAF3IP3 | Intron 1      |
| chr1 | 207998521 | 207998553 | 33  | TRAF3IP3 | Intron 1      |
| chr1 | 207999880 | 208000159 | 280 | TRAF3IP3 | <b>Exon 3</b> |
| chr1 | 208000165 | 208000192 | 28  | TRAF3IP3 | <b>Exon 3</b> |
| chr1 | 208000194 | 208000235 | 42  | TRAF3IP3 | <b>Exon 3</b> |
| chr1 | 208001204 | 208001241 | 38  | TRAF3IP3 | Intron 3      |
| chr1 | 208001252 | 208001280 | 29  | TRAF3IP3 | Intron 3      |
| chr1 | 208002601 | 208002645 | 45  | TRAF3IP3 | <b>Exon 4</b> |
| chr1 | 208002763 | 208002858 | 96  | TRAF3IP3 | <b>Exon 5</b> |
| chr1 | 208003022 | 208003071 | 50  | TRAF3IP3 | <b>Exon 6</b> |

|      |           |           |     |          |                |                  |
|------|-----------|-----------|-----|----------|----------------|------------------|
| chr1 | 208003311 | 208003374 | 64  | TRAF3IP3 | <b>Exon 7</b>  |                  |
| chr1 | 208003453 | 208003572 | 120 | TRAF3IP3 | <b>Exon 8</b>  |                  |
| chr1 | 208006254 | 208006296 | 43  | TRAF3IP3 | Intron 8       |                  |
| chr1 | 208008512 | 208008652 | 141 | TRAF3IP3 | Intron 8       |                  |
| chr1 | 208008818 | 208008843 | 26  | TRAF3IP3 | Intron 8       |                  |
| chr1 | 208008901 | 208008934 | 34  | TRAF3IP3 | Intron 8       |                  |
| chr1 | 208009376 | 208009413 | 38  | TRAF3IP3 | Intron 8       |                  |
| chr1 | 208009423 | 208009622 | 200 | TRAF3IP3 | Intron 8       |                  |
| chr1 | 208012884 | 208013006 | 123 | TRAF3IP3 | <b>Exon 9</b>  |                  |
| chr1 | 208013991 | 208014030 | 40  | TRAF3IP3 | Intron 9       |                  |
| chr1 | 208015277 | 208015468 | 192 | TRAF3IP3 | <b>Exon 10</b> |                  |
| chr1 | 208015551 | 208015729 | 179 | TRAF3IP3 | <b>Exon 11</b> |                  |
| chr1 | 208017307 | 208017472 | 166 | TRAF3IP3 | <b>Exon 12</b> |                  |
| chr1 | 208017755 | 208017794 | 40  | TRAF3IP3 | Intron 12      | <b>MCS+28.3</b>  |
| chr1 | 208017915 | 208017943 | 29  | TRAF3IP3 | Intron 12      | <b>MCS+28.3</b>  |
| chr1 | 208018058 | 208018177 | 120 | TRAF3IP3 | <b>Exon 13</b> |                  |
| chr1 | 208019202 | 208019227 | 26  | TRAF3IP3 | Intron 13      |                  |
| chr1 | 208019237 | 208019384 | 148 | TRAF3IP3 | <b>Exon 14</b> |                  |
| chr1 | 208019395 | 208019424 | 30  | TRAF3IP3 | <b>Exon 14</b> |                  |
| chr1 | 208019535 | 208019565 | 31  | TRAF3IP3 | <b>Exon 14</b> |                  |
| chr1 | 208019580 | 208019652 | 73  | TRAF3IP3 | <b>Exon 14</b> |                  |
| chr1 | 208019654 | 208019678 | 25  | TRAF3IP3 | Intron 14      |                  |
| chr1 | 208020412 | 208020466 | 55  | TRAF3IP3 | <b>Exon 15</b> |                  |
| chr1 | 208020472 | 208020594 | 123 | TRAF3IP3 | <b>Exon 15</b> |                  |
| chr1 | 208020808 | 208020833 | 26  | TRAF3IP3 | Intron 15      |                  |
| chr1 | 208021304 | 208021416 | 113 | TRAF3IP3 | <b>Exon 16</b> |                  |
| chr1 | 208021420 | 208021444 | 25  | TRAF3IP3 | <b>Exon 16</b> |                  |
| chr1 | 208022022 | 208022110 | 89  | TRAF3IP3 | <b>Exon 17</b> |                  |
| chr1 | 208022787 | 208022906 | 120 | C1orf74  | <b>Exon 2</b>  |                  |
| chr1 | 208022908 | 208022958 | 51  | C1orf74  | <b>Exon 2</b>  |                  |
| chr1 | 208022973 | 208023127 | 155 | C1orf74  | <b>Exon 2</b>  |                  |
| chr1 | 208023155 | 208023238 | 84  | C1orf74  | <b>Exon 2</b>  |                  |
| chr1 | 208023240 | 208023362 | 123 | C1orf74  | <b>Exon 2</b>  |                  |
| chr1 | 208023377 | 208023501 | 125 | C1orf74  | <b>Exon 2</b>  |                  |
| chr1 | 208023517 | 208023586 | 70  | C1orf74  | <b>Exon 2</b>  |                  |
| chr1 | 208025534 | 208025558 | 25  |          | Intergenic     |                  |
| chr1 | 208025730 | 208025754 | 25  |          | Intergenic     |                  |
| chr1 | 208025763 | 208025788 | 26  |          | Intergenic     |                  |
| chr1 | 208027706 | 208027778 | 73  | IRF6     | <b>3' UTR</b>  | <b>3' of ex9</b> |
| chr1 | 208027805 | 208027905 | 101 | IRF6     | <b>3' UTR</b>  | <b>3' of ex9</b> |
| chr1 | 208027929 | 208027983 | 55  | IRF6     | <b>3' UTR</b>  | <b>3' of ex9</b> |
| chr1 | 208028208 | 208028245 | 38  | IRF6     | <b>3' UTR</b>  |                  |
| chr1 | 208028299 | 208028366 | 68  | IRF6     | <b>3' UTR</b>  |                  |
| chr1 | 208028388 | 208028635 | 248 | IRF6     | <b>Exon 9</b>  |                  |
| chr1 | 208029618 | 208029772 | 155 | IRF6     | <b>Exon 8</b>  |                  |
| chr1 | 208030448 | 208030881 | 434 | IRF6     | <b>Exon 7</b>  |                  |
| chr1 | 208030908 | 208031027 | 120 | IRF6     | Intron 6       | <b>Intron 6</b>  |
| chr1 | 208031399 | 208031430 | 32  | IRF6     | Intron 6       | <b>Intron 6</b>  |
| chr1 | 208032062 | 208032091 | 30  | IRF6     | Intron 6       | <b>Intron 6</b>  |
| chr1 | 208032223 | 208032411 | 189 | IRF6     | <b>Exon 6</b>  |                  |
| chr1 | 208033080 | 208033104 | 25  | IRF6     | Intron 5       |                  |
| chr1 | 208035243 | 208035405 | 163 | IRF6     | <b>Exon 5</b>  |                  |
| chr1 | 208036291 | 208036537 | 247 | IRF6     | <b>Exon 4</b>  |                  |
| chr1 | 208041187 | 208041395 | 209 | IRF6     | <b>Exon 3</b>  |                  |

|      |           |           |     |           |            |           |
|------|-----------|-----------|-----|-----------|------------|-----------|
| chr1 | 208041417 | 208041445 | 29  | IRF6      | Intron 2   | Intron 2  |
| chr1 | 208041470 | 208041533 | 64  | IRF6      | Intron 2   | Intron 2  |
| chr1 | 208041535 | 208041702 | 168 | IRF6      | Intron 2   | Intron 2  |
| chr1 | 208041738 | 208041792 | 55  | IRF6      | Intron 2   | Intron 2  |
| chr1 | 208042136 | 208042160 | 25  | IRF6      | Intron 1   | Intron 1e |
| chr1 | 208042285 | 208042329 | 45  | IRF6      | Intron 1   | Intron 1d |
| chr1 | 208042460 | 208042492 | 33  | IRF6      | Intron 1   | Intron 1c |
| chr1 | 208042523 | 208042552 | 30  | IRF6      | Intron 1   | Intron 1b |
| chr1 | 208042896 | 208043008 | 113 | IRF6      | Intron 1   | Intron 1b |
| chr1 | 208045290 | 208045348 | 59  | IRF6      | Intron 1   | Intron 1a |
| chr1 | 208045353 | 208045380 | 28  | IRF6      | Intron 1   | Intron 1a |
| chr1 | 208045404 | 208045428 | 25  | IRF6      | Intron 1   | Intron 1a |
| chr1 | 208046058 | 208046115 | 58  | IRF6      | 5' UTR     | Promoter  |
| chr1 | 208046147 | 208046180 | 34  |           | Intergenic | Promoter  |
| chr1 | 208048220 | 208048249 | 30  |           | Intergenic | MCS-2     |
| chr1 | 208048321 | 208048346 | 26  |           | Intergenic | MCS-2     |
| chr1 | 208049711 | 208049764 | 54  |           | Intergenic | MCS-3.6   |
| chr1 | 208054851 | 208054881 | 31  |           | Intergenic | MCS-8.7   |
| chr1 | 208055903 | 208055934 | 32  |           | Intergenic | MCS-9.7   |
| chr1 | 208055954 | 208055982 | 29  |           | Intergenic | MCS-9.7   |
| chr1 | 208055984 | 208056015 | 32  |           | Intergenic | MCS-9.7   |
| chr1 | 208056021 | 208056086 | 66  |           | Intergenic | MCS-9.7   |
| chr1 | 208056089 | 208056117 | 29  |           | Intergenic | MCS-9.7   |
| chr1 | 208056146 | 208056264 | 119 |           | Intergenic | MCS-9.7   |
| chr1 | 208056545 | 208056572 | 28  |           | Intergenic |           |
| chr1 | 208057206 | 208057241 | 36  |           | Intergenic | MCS-11    |
| chr1 | 208057248 | 208057297 | 50  |           | Intergenic | MCS-11    |
| chr1 | 208057300 | 208057345 | 46  |           | Intergenic | MCS-11    |
| chr1 | 208063651 | 208063675 | 25  |           | Intergenic |           |
| chr1 | 208065985 | 208066019 | 35  |           | Intergenic | MCS-20    |
| chr1 | 208066036 | 208066069 | 34  |           | Intergenic | MCS-20    |
| chr1 | 208066184 | 208066229 | 46  |           | Intergenic | MCS-20    |
| chr1 | 208067893 | 208067921 | 29  |           | Intergenic | MCS-20    |
| chr1 | 208068024 | 208068144 | 121 | C10orf107 | Exon 1     |           |
| chr1 | 208070062 | 208070126 | 65  | C10orf107 | Exon 2     |           |
| chr1 | 208070758 | 208070836 | 79  | C10orf107 | Exon 3     |           |
| chr1 | 208070838 | 208070887 | 50  | C10orf107 | Exon 3     |           |
| chr1 | 208070892 | 208070918 | 27  | C10orf107 | Exon 3     |           |
| chr1 | 208073228 | 208073300 | 73  | C10orf107 | Exon 4     |           |
| chr1 | 208075028 | 208075123 | 96  | C10orf107 | Exon 5     |           |
| chr1 | 208076792 | 208076933 | 142 | C10orf107 | Exon 6     |           |
| chr1 | 208076936 | 208077014 | 79  | C10orf107 | Exon 6     |           |
| chr1 | 208077016 | 208077199 | 184 | C10orf107 | Exon 6     |           |
| chr1 | 208078876 | 208079106 | 231 | C10orf107 | Exon 7     |           |
| chr1 | 208080818 | 208081038 | 221 | C10orf107 | Exon 8     |           |
| chr1 | 208081250 | 208081276 | 27  | C10orf107 | Intron 7   |           |
| chr1 | 208081911 | 208081936 | 26  | C10orf107 | Intron 7   |           |
| chr1 | 208082226 | 208082405 | 180 | C10orf107 | Exon 9     |           |
| chr1 | 208082541 | 208082672 | 132 | C10orf107 | Exon 10    |           |
| chr1 | 208083410 | 208083675 | 266 | C10orf107 | Exon 11    |           |
| chr1 | 208085367 | 208085422 | 56  | C10orf107 | Intron 11  |           |
| chr1 | 208090660 | 208090684 | 25  | C10orf107 | Intron 11  |           |
| chr1 | 208090759 | 208090783 | 25  | C10orf107 | Intron 11  |           |
| chr1 | 208091167 | 208091226 | 60  | C10orf107 | Intron 11  |           |

|      |           |           |     |           |                |               |
|------|-----------|-----------|-----|-----------|----------------|---------------|
| chr1 | 208091234 | 208091378 | 145 | C10orf107 | <b>Exon 12</b> |               |
| chr1 | 208091381 | 208091417 | 37  | C10orf107 | <b>3'UTR</b>   |               |
| chr1 | 208093906 | 208093930 | 25  | C10orf107 | <b>3'UTR</b>   |               |
| chr1 | 208094401 | 208094439 | 39  | C10orf107 | <b>3'UTR</b>   |               |
| chr1 | 208095674 | 208095710 | 37  | C10orf107 | <b>3'UTR</b>   |               |
| chr1 | 208095781 | 208095822 | 42  | C10orf107 | <b>3'UTR</b>   |               |
| chr1 | 208100450 | 208100474 | 25  |           | Intergenic     |               |
| chr1 | 208110108 | 208110224 | 117 |           | Intergenic     |               |
| chr1 | 208110613 | 208110639 | 27  |           | Intergenic     |               |
| chr1 | 208114828 | 208114853 | 26  |           | Intergenic     |               |
| chr1 | 208115780 | 208115839 | 60  |           | Intergenic     | <b>MCS-70</b> |
| chr1 | 208115852 | 208115925 | 74  |           | Intergenic     | <b>MCS-70</b> |
| chr1 | 208117024 | 208117068 | 45  |           | Intergenic     |               |
| chr1 | 208117089 | 208117161 | 73  |           | Intergenic     |               |
| chr1 | 208117274 | 208117333 | 60  |           | Intergenic     |               |
| chr1 | 208118904 | 208118930 | 27  |           | Intergenic     |               |
| chr1 | 208119560 | 208119587 | 28  |           | Intergenic     |               |
| chr1 | 208119594 | 208119620 | 27  |           | Intergenic     |               |
| chr1 | 208119791 | 208119841 | 51  |           | Intergenic     |               |
| chr1 | 208119843 | 208119935 | 93  |           | Intergenic     |               |
| chr1 | 208119973 | 208120068 | 96  |           | Intergenic     |               |
| chr1 | 208120134 | 208120166 | 33  |           | Intergenic     |               |
| chr1 | 208123752 | 208123815 | 64  |           | Intergenic     |               |
| chr1 | 208123820 | 208123961 | 142 |           | Intergenic     |               |
| chr1 | 208124932 | 208124977 | 46  |           | Intergenic     |               |
| chr1 | 208125027 | 208125176 | 150 |           | Intergenic     |               |
| chr1 | 208130888 | 208130985 | 98  |           | Intergenic     |               |
| chr1 | 208131005 | 208131099 | 95  |           | Intergenic     |               |
| chr1 | 208131116 | 208131141 | 26  |           | Intergenic     |               |
| chr1 | 208131167 | 208131201 | 35  |           | Intergenic     |               |
| chr1 | 208131255 | 208131279 | 25  |           | Intergenic     |               |
| chr1 | 208140659 | 208140683 | 25  |           | Intergenic     |               |
| chr1 | 208141344 | 208141382 | 39  |           | Intergenic     |               |
| chr1 | 208141562 | 208141592 | 31  |           | Intergenic     |               |
| chr1 | 208141632 | 208141662 | 31  |           | Intergenic     |               |
| chr1 | 208141701 | 208141748 | 48  |           | Intergenic     |               |
| chr1 | 208142717 | 208142748 | 32  |           | Intergenic     |               |
| chr1 | 208149761 | 208149807 | 47  |           | Intergenic     |               |
| chr1 | 208154475 | 208154507 | 33  |           | Intergenic     |               |
| chr1 | 208155316 | 208155341 | 26  |           | Intergenic     |               |
| chr1 | 208162548 | 208162578 | 31  |           | Intergenic     |               |
| chr1 | 208163109 | 208163137 | 29  |           | Intergenic     |               |
| chr1 | 208166239 | 208166277 | 39  |           | Intergenic     |               |
| chr1 | 208166310 | 208166397 | 88  |           | Intergenic     |               |
| chr1 | 208166402 | 208166435 | 34  |           | Intergenic     |               |
| chr1 | 208166536 | 208166567 | 32  |           | Intergenic     |               |
| chr1 | 208167018 | 208167042 | 25  |           | Intergenic     |               |
| chr1 | 208167376 | 208167402 | 27  |           | Intergenic     |               |
| chr1 | 208167444 | 208167480 | 37  |           | Intergenic     |               |
| chr1 | 208167553 | 208167584 | 32  |           | Intergenic     |               |
| chr1 | 208174860 | 208174886 | 27  |           | Intergenic     |               |
| chr1 | 208174975 | 208174999 | 25  |           | Intergenic     |               |
| chr1 | 208175046 | 208175083 | 38  |           | Intergenic     |               |
| chr1 | 208175184 | 208175234 | 51  |           | Intergenic     |               |

|      |           |           |     |        |               |
|------|-----------|-----------|-----|--------|---------------|
| chr1 | 208176970 | 208176999 | 30  |        | Intergenic    |
| chr1 | 208177001 | 208177078 | 78  |        | Intergenic    |
| chr1 | 208178207 | 208178255 | 49  | sytXIV | <b>Exon 1</b> |
| chr1 | 208182285 | 208182310 | 26  | sytXIV | Intron 1      |
| chr1 | 208183980 | 208184004 | 25  | sytXIV | Intron 1      |
| chr1 | 208188414 | 208188445 | 32  | sytXIV | Intron 1      |
| chr1 | 208188480 | 208188510 | 31  | sytXIV | Intron 1      |
| chr1 | 208192660 | 208192740 | 81  | sytXIV | <b>Exon 2</b> |
| chr1 | 208192928 | 208192968 | 41  | sytXIV | Intron 2      |
| chr1 | 208192972 | 208193117 | 146 | sytXIV | intron 2      |
| chr1 | 208193129 | 208193212 | 84  | sytXIV | Intron 2      |
| chr1 | 208193214 | 208193311 | 98  | sytXIV | Intron 2      |
| chr1 | 208193799 | 208193823 | 25  | sytXIV | Intron 2      |
| chr1 | 208202374 | 208202412 | 39  | sytXIV | Intron 2      |
| chr1 | 208202516 | 208202567 | 52  | sytXIV | Intron 2      |
| chr1 | 208202579 | 208202604 | 26  | sytXIV | Intron 2      |
| chr1 | 208229701 | 208229746 | 46  | sytXIV | Intron 3      |
| chr1 | 208230500 | 208230543 | 44  | sytXIV | Intron 3      |
| chr1 | 208246492 | 208246553 | 62  | sytXIV | Intron 3      |
| chr1 | 208251644 | 208251668 | 25  | sytXIV | Intron 3      |
| chr1 | 208253595 | 208253737 | 143 | sytXIV | <b>Exon 4</b> |
| chr1 | 208253740 | 208253775 | 36  | sytXIV | Intron 4      |
| chr1 | 208255607 | 208255647 | 41  | sytXIV | Intron 4      |
| chr1 | 208255666 | 208255707 | 42  | sytXIV | Intron 4      |
| chr1 | 208255744 | 208255771 | 28  | sytXIV | Intron 4      |
| chr1 | 208255868 | 208255900 | 33  | sytXIV | Intron 4      |
| chr1 | 208255916 | 208255956 | 41  | sytXIV | Intron 4      |
| chr1 | 208255958 | 208255985 | 28  | sytXIV | Intron 4      |
| chr1 | 208257054 | 208257086 | 33  | sytXIV | Intron 4      |
| chr1 | 208260994 | 208261065 | 72  | sytXIV | <b>Exon 5</b> |
| chr1 | 208261082 | 208261107 | 26  | sytXIV | <b>Exon 5</b> |
| chr1 | 208266579 | 208266616 | 38  | sytXIV | Intron 5      |

\*Coordinates are given according to UCSC Human Genome Browser Bld 36.1 (March 2006)

\*\*Multiple and closely arranged MCSs were amplified in single amplicons

(see **Supplementary Table 4** for sequenced regions and primers used)

*IRF6* coding sequences are highlighted in yellow

MCS-9.7 is highlighted in red
