# Supplementary material
Source: PubMed Central journal article supplement (PMC2691688)
Supplement: NIHMS67305-supplement-4.pdf [file NIHMS67305-supplement-4.pdf]

**Supplementary Figure 1 Legend:** Multispecies sequence alignment of the MCS-9.7 segment corresponding to nucleotides from –14470 to –14654 with respect to *IRF6* translation initiation site, that contains four putative AP-2 $\alpha$  binding sites (highlighted in yellow) predicted by the TESS software <http://www.cbil.upenn.edu/tess>. Variants -14474A>G, rs642961 (G>A) and -14523G>A, are indicated by vertical arrows.
