# Supplementary material
Source: PubMed Central journal article supplement (PMC2691688)
Supplement: NIHMS67305-supplement-6.pdf [file NIHMS67305-supplement-6.pdf]

**Supplementary Figure 2.** Analysis of MCS-9.7 regulatory activity in HFK cell line using luciferase reporter assay. Bars represent mean  $\pm$  SEM of the luciferase activity data from seven independent experiments performed in triplicates (21 data points total). GGA and AGG are the non-associated haplotype constructs; AAG is the risk haplotype construct. SV40, luciferase expression driven by the SV40 promoter alone.
