# Supplementary material
Source: PubMed Central journal article supplement (PMC2691688)
Supplement: NIHMS67305-supplement-8.pdf [file NIHMS67305-supplement-8.pdf]

**Supplementary Table 2: Worldwide distribution of rs642961 allele frequencies determined from CEHP Human Genome Diversity Panel, <http://www.cephb.fr/HGDP-CEPH-Panel/>**

| Region                       | Population     | rs642961-G | rs642961-A | Total      | G-freq      | A-freq      |
|------------------------------|----------------|------------|------------|------------|-------------|-------------|
| Central African Republic     | Biaka Pygmies  | 67         | 3          | 70         | 0.96        | 0.04        |
| Democratic Republic of Congo | Mbuti Pygmies  | 18         | 12         | 30         | 0.60        | 0.40        |
| Senegal                      | Mandenka       | 40         | 6          | 46         | 0.87        | 0.13        |
| Nigeria                      | Yoruba         | 48         | 2          | 50         | 0.96        | 0.04        |
| Kenya                        | Bantu N.E.     | 24         | 0          | 24         | 1.00        | 0.00        |
| Namidia                      | San            | 14         | 0          | 14         | 1.00        | 0.00        |
| South Africa                 | Bantu          | 15         | 1          | 16         | 0.94        | 0.06        |
| Algeria (Mzab)               | Mozabite       | 50         | 10         | 60         | 0.83        | 0.17        |
| <b>AFRICA</b>                |                | <b>276</b> | <b>34</b>  | <b>310</b> | <b>0.89</b> | <b>0.11</b> |
| Israel                       | Bedouin        | 79         | 19         | 98         | 0.81        | 0.19        |
| Israel                       | Druze          | 79         | 15         | 94         | 0.84        | 0.16        |
| Israel                       | Palestinian    | 84         | 18         | 102        | 0.82        | 0.18        |
| Pakistan                     | Brahui         | 34         | 16         | 50         | 0.68        | 0.32        |
| Pakistan                     | Balochi        | 40         | 10         | 50         | 0.80        | 0.20        |
| Pakistan                     | Hazara         | 42         | 8          | 50         | 0.84        | 0.16        |
| Pakistan                     | Makrani        | 40         | 10         | 50         | 0.80        | 0.20        |
| Pakistan                     | Sindhi         | 38         | 12         | 50         | 0.76        | 0.24        |
| Pakistan                     | Pathan         | 39         | 11         | 50         | 0.78        | 0.22        |
| Pakistan                     | Kalash         | 35         | 15         | 50         | 0.70        | 0.30        |
| Pakistan                     | Barusho        | 39         | 11         | 50         | 0.78        | 0.22        |
| <b>PAKISTAN</b>              |                | <b>307</b> | <b>93</b>  | <b>400</b> | <b>0.77</b> | <b>0.23</b> |
| China                        | Han            | 70         | 18         | 88         | 0.80        | 0.20        |
| China                        | Tujia          | 13         | 7          | 20         | 0.65        | 0.35        |
| China                        | Yizu           | 19         | 1          | 20         | 0.95        | 0.05        |
| China                        | Miaozu         | 16         | 4          | 20         | 0.80        | 0.20        |
| China                        | Oroqen         | 17         | 3          | 20         | 0.85        | 0.15        |
| China                        | Daur           | 17         | 3          | 20         | 0.85        | 0.15        |
| China                        | Mongola        | 17         | 3          | 20         | 0.85        | 0.15        |
| China                        | Hezhen         | 16         | 4          | 20         | 0.80        | 0.20        |
| China                        | Xibo           | 13         | 6          | 19         | 0.68        | 0.32        |
| China                        | Uygur          | 17         | 3          | 20         | 0.85        | 0.15        |
| China                        | Lahu           | 16         | 4          | 20         | 0.80        | 0.20        |
| China                        | She            | 17         | 3          | 20         | 0.85        | 0.15        |
| China                        | Naxi           | 16         | 4          | 20         | 0.80        | 0.20        |
| China                        | Tu             | 14         | 6          | 20         | 0.70        | 0.30        |
| <b>CHINA</b>                 |                | <b>278</b> | <b>69</b>  | <b>347</b> | <b>0.80</b> | <b>0.20</b> |
| Siberia                      | Yakut          | 35         | 13         | 48         | 0.73        | 0.27        |
| Japan                        | Japanese       | 54         | 8          | 62         | 0.87        | 0.13        |
| Cambodia                     | Cambodian      | 18         | 4          | 22         | 0.82        | 0.18        |
| New Guinea                   | Papuan         | 26         | 8          | 34         | 0.76        | 0.24        |
| Bougainville                 | NAN Melanesian | 31         | 13         | 44         | 0.70        | 0.30        |
| France                       | Frence         | 49         | 9          | 58         | 0.84        | 0.16        |
| France                       | French Basque  | 30         | 10         | 40         | 0.75        | 0.25        |
| Italy                        | Sardinian      | 44         | 12         | 56         | 0.79        | 0.21        |
| Italy                        | North Italian  | 27         | 1          | 28         | 0.96        | 0.04        |
| Italy                        | Tuscan         | 11         | 5          | 16         | 0.69        | 0.31        |
| Orkney Islands               | Orcadian       | 28         | 4          | 32         | 0.88        | 0.13        |
| Russia Caucasus              | Adygei         | 24         | 6          | 30         | 0.80        | 0.20        |
| Russia                       | Russian        | 42         | 6          | 48         | 0.88        | 0.13        |
| Colombia                     | Colombian      | 23         | 3          | 26         | 0.88        | 0.12        |
| Mexico                       | Pima           | 37         | 13         | 50         | 0.74        | 0.26        |
| Mexico                       | Maya           | 35         | 15         | 50         | 0.70        | 0.30        |
| Brazil                       | Karitiana      | 34         | 14         | 48         | 0.71        | 0.29        |
| Brazil                       | Surui          | 32         | 10         | 42         | 0.76        | 0.24        |
| <b>NATIVE AMERICAN</b>       |                | <b>138</b> | <b>52</b>  | <b>190</b> | <b>0.73</b> | <b>0.27</b> |
