# Supplementary material
Source: PubMed Central journal article supplement (PMC2691688)
Supplement: NIHMS67305-supplement-9.pdf [file NIHMS67305-supplement-9.pdf]

**Supplementary Table 4: Primers used to amplify *IRF6* Multispecies Conserved Sequences (MCSs)**

| <b>MCS</b>  | <b>Forward Primer</b>            | <b>Reverse Primer</b>            | <b>UCSC hg18 coordinates</b>    |
|-------------|----------------------------------|----------------------------------|---------------------------------|
| -70         | CATCAGAAAGGAGGGAGCAG             | AAGGGCATTGCCAAAATATG             | chr1:208115704-208115964        |
| -20         | GGGTGGGGCTAGGGTAAAT              | ATTCCTAATTAGATTCGGAGAGG          | chr1:208065913-208066382        |
| -11         | TATACCCCTGCCTTGACCTG             | AGAGTGTGGTGGGGATTTC              | chr1:208057098-208057400        |
| <b>-9.7</b> | <b>CTCCTCTGTTTGCTTAGCTTACCTC</b> | <b>CTGGTAAATGGTGAGTAGGAAGTTG</b> | <b>chr1:208055755-208056361</b> |
| -8.7        | ATGTCCTGTGCATGACTCCA             | GTCACCCCAGGGAATTAAGC             | chr1:208054738-208055007        |
| -3.6        | CCACAAGCTCTTGAGGAATCA            | GAGAGTGGGATTTGGGTTCA             | chr1:208049592-208049937        |
| -2          | GTTGAAGAGCCCCAGATTGA             | TCCAGGGCACTTGACTCTTT             | chr1:208048091-208048702        |
| Promoter    | CGTACCCACCTTTGCTCAAT             | CCAACCCAGAATCTCAAACC             | chr1:208045906-208046469        |
| Intron 1a   | TGAGTGCCACTGTCATACATC            | CCAGGAGCTTTGGAGCATT              | chr1:208045041-208045487        |
| Intron 1b   | GGCCAATAAAGTGATTGAGG             | GCGTGTGTTTTAACCTGAGC             | chr1:208044398-208044837        |
| Intron 1c   | TAAGGCAATCAGGCCAAGAC             | CAGTCAAGTTGTATGCTGTTCC           | chr1:208043409-208043868        |
| Intron 1d   | AGGTCACCTTCATACCCAGAAA           | TAGTGATAGGACTGGGGAGCA            | chr1:208042669-208043188        |
| Intron 1e   | GAGAAGGCTTGGGAACACTG             | CATTGTGGGGCTTGAGAAGT             | chr1:208042070-208042643        |
| Intron 2    | AGGGCTTTAGCCGGACTCT              | CCCATTACCTTTAGTTGTCTTG           | chr1:208041345-208041856        |
| Intron 6    | AGAGTCGGCAGCCCTGAG               | TTTAGCTCCTTCCAATGACCA            | chr1:208030769-208031193        |
| 3' of ex9   | AGGCTAAACTGCCTGGAACA             | CTGTACCTACCCCTCTCC               | chr1:208027559-208027969        |
| 28.3        | TTTTAGCCCATCCCTCTGG              | TCTTCGTGCCAGTTCTGA               | chr1:208017687-208017948        |

UCSC Genome Browser: <http://www.genome.ucsc.edu/>

MCSs are identified by their distance in kilobases from *IRF6* transcription start site (chr1:208046102 UCSC hg18)

#### Primers used in Chromatin Immunoprecipitation (ChIP) assay

| <b>Amplicon</b>   | <b>Forward Primer</b>    | <b>Reverse Primer</b>    | <b>UCSC hg18 coordinates</b> |
|-------------------|--------------------------|--------------------------|------------------------------|
| Target in MCS-9.7 | GATTGGAGCTTTGGAATGTTAATC | ACAGAATAGTAACTGGGAGGTTGC | chr1:208055840-208056093     |
| Control region    | GAATAATTTGTGACAACTGCCTTG | AATTTGAGGAGAGTAGACCACCAG | chr1:208022115-208022373     |
