# Supplementary material
Source: PubMed Central journal article supplement (PMC2691688)
Supplement: NIHMS67305-supplement-11.pdf [file NIHMS67305-supplement-11.pdf]

**Supplementary Table 3: *IRF6* locus coordinates and genome assemblies**

| <b>Organism</b> | <b>UCSC Genome Browser coordinates</b>       | <b>Build</b>  |
|-----------------|----------------------------------------------|---------------|
| Human           | chr1:207786994-208286993                     | March 2006    |
| Chimp           | chr1:189982478-190486018                     | March 2006    |
| Rhesus          | chr1:160355582-160859543                     | January 2006  |
| Rat             | chr13:108826445-109255967                    | November 2004 |
| Mouse           | chr1:194795892-195233688                     | July 2006     |
| Dog             | chr7:11156498-11636370                       | May 2005      |
| Cow             | chr16:67677502-67941385                      | August 2006   |
| Cat             | scaffold_129274:24555-91072                  | March 2006    |
| Tenrec          | scaffold_124:63192-75668 ( <i>Ensemble</i> ) | October 2007  |
| Opossum         | chr2:116773085-117442209                     | January 2006  |
| Chicken         | chr3:23923223-24003837                       | May 2006      |
|                 | chr26:2926576-2995482                        | May 2006      |
| Frog            | scaffold_375:789749-797232                   | August 2005   |
|                 | scaffold_61:1446322-1455782                  | August 2005   |
| Tetraodon       | chr11:5978227-5980600                        | February 2004 |

UCSC Genome Browser: <http://www.genome.ucsc.edu/>

Ensemble: <http://www.ensembl.org/index.html>

**BAC clones from organisms sequenced by the NIH Intramural Sequencing Center (NISC)**

| <b>Organism</b>         | <b>Clone name</b> | <b>GenBank ID</b> |
|-------------------------|-------------------|-------------------|
| Rabbit                  | LB1-121D24        | AC173439          |
| Rabbit                  | LB1-183A3         | AC164495          |
| Rabbit                  | LB1-183H5         | AC163952          |
| Rabbit                  | LB1-289D12        | AC166022          |
| Pig                     | RP44-357O11       | AC164944          |
| Pig                     | RP44-274O19       | AC166031          |
| Pig                     | RP44-55L3         | AC167303          |
| Pig                     | RP44-327E16       | AC164503          |
| Bat (greater horseshoe) | VMRC7-303M11      | AC163982          |
| Bat (greater horseshoe) | VMRC7-280A9       | AC164951          |
| Bat (greater horseshoe) | VMRC7-285O13      | AC165214          |
| Bat (greater horseshoe) | VMRC7-212E18      | AC167528          |
| Armadillo (nine-banded) | VMRC5-471F9       | AC169168          |
| Armadillo (nine-banded) | VMRC5-148P11      | AC171392          |
| Armadillo (nine-banded) | VMRC5-151G4       | AC164515          |
| Elephant (African)      | VMRC15-220O23     | AC166032          |
| Elephant (African)      | VMRC15-370J11     | AC164528          |
| Elephant (African)      | VMRC15-554C21     | AC164513          |
| Elephant (African)      | VMRC15-515M5      | AC164512          |

BAC sequence data can also be accessed at:

[http://www.nisc.nih.gov/open\\_page.cgi?path=/projects/comp\\_seq.html](http://www.nisc.nih.gov/open_page.cgi?path=/projects/comp_seq.html)
