# Supplementary material
Source: PubMed Central journal article supplement (PMC2691688)

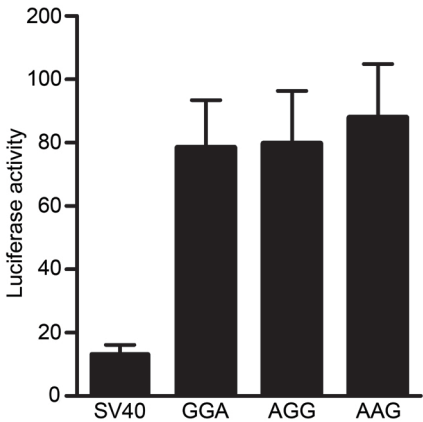

Supplement: NIHMS67305-supplement-7.pdf [file NIHMS67305-supplement-7.pdf]
